22 **Abstract**

23 The hypoxic ventilatory response (HVR) is critical to breathing and thus oxygen supply to  
24 the body and is primarily mediated by the carotid bodies. Here we reveal that carotid body  
25 afferent discharge during hypoxia and hypercapnia is determined by the expression of  
26 Liver Kinase B1 (LKB1), the principal kinase that activates the AMP-activated protein  
27 kinase (AMPK) during metabolic stresses. Conversely, conditional deletion in  
28 catecholaminergic cells of AMPK had no effect on carotid body responses to hypoxia or  
29 hypercapnia. By contrast, the HVR was attenuated by LKB1 and AMPK deletion.  
30 However, in LKB1 knockouts hypoxia evoked hypoventilation, apnoea and  
31 Cheyne-Stokes-like breathing, while only hypoventilation and apnoea were observed after  
32 AMPK deletion. We therefore identify LKB1 as an essential regulator of carotid body  
33 chemosensing and uncover a divergence in dependency on LKB1 and AMPK between  
34 the carotid body on one hand and the HVR on the other.

35

## 36 **Introduction**

37 The hypoxic ventilatory response (HVR) delivers compensatory increases in ventilatory  
38 drive where there are deficiencies in oxygen availability. The HVR is initiated by increases  
39 in afferent fibre discharge from the carotid bodies, the primary peripheral arterial  
40 chemoreceptors of mammals that are located within the bifurcations of the carotid artery,  
41 ideally situated to monitor blood flow to the brain. Within the carotid body falls in arterial  
42  $PO_2$  (and increases in arterial  $PCO_2$ ) are sensed directly by carotid body type I cells, where  
43 consequent depolarisation elicits exocytotic release of ATP that mediates increases in  
44 chemoafferent discharge to the respiratory central pattern generators in the brainstem<sup>1-3</sup>.

45 We recently showed that in addition to regulating metabolic homeostasis in a cell  
46 autonomous manner<sup>4</sup> the AMP-activated protein kinase (AMPK) facilitates the HVR and  
47 thus oxygen and energy (ATP) supply to the whole body<sup>5</sup>. In doing so, we demonstrated  
48 that AMPK acts not at the level of the carotid bodies as one would predict but downstream  
49 at the brainstem. Briefly, conditional deletion of AMPK in catecholaminergic neurons of  
50 mice precipitates hypoventilation and apnoea during poikilocapnic hypoxia<sup>5</sup>, that  
51 resembles central apnoea of prematurity<sup>6, 7</sup> and central sleep apnoea<sup>8</sup> in neonate and  
52 adult humans, respectively. That said, the HVR of these mice is most reminiscent of the  
53 HVR observed in premature infants where the hypercapnic hypoxic ventilatory response  
54 is similarly conserved<sup>9</sup>. Given such face validity that resembles symptoms in patients, it  
55 is important that we identify the mechanism(s) by which AMPK is regulated in the context  
56 of the HVR.

57 The principal pathway of AMPK activation by metabolic stresses is through direct  
58 phosphorylation by Liver Kinase B1 (LKB1), which exists in a complex with regulatory  
59 proteins STRAD and MO25<sup>10-12</sup>. LKB1 also regulates by direct phosphorylation eleven of  
60 the twelve AMPK-related kinases<sup>13</sup>, but in each case this is insensitive to metabolic  
61 stresses<sup>14</sup>. Only AMPK is coupled to LKB1 through changes in the cellular AMP:ATP and  
62 ADP:ATP ratios<sup>15</sup>, that may be triggered through inhibition of mitochondrial oxidative  
63 phosphorylation during hypoxia, as is the HVR<sup>16, 17</sup>. Binding of AMP to the AMPK- $\gamma$   
64 subunit increases activity 10-fold by allosteric activation alone, while binding of AMP or  
65 ADP triggers increases in phosphorylation of Thr172 on the  $\alpha$  subunit by LKB1 (conferring  
66 up to 100-fold further activation) and at the same time reduces Thr172  
67 dephosphorylation<sup>18</sup>. However, alternative AMP-independent mechanisms of AMPK  
68 activation have been identified: (i) calcium-dependent Thr172 phosphorylation by the  
69 calmodulin-dependent protein kinase CaMKK2<sup>19</sup>; (ii) long chain fatty acyl-CoA binding to  
70 the Allosteric Drug & Metabolite (ADaM) site on the  $\alpha$  subunit<sup>20</sup>; (iii) glucose-deprivation<sup>21</sup>.

71 Clearly, the most likely path to AMPK activation during hypoxia would be through  
72 increases in the AM(D)P:ATP ratio and thus LKB1-dependent phosphorylation. However,  
73 the fact that AMPK facilitates the HVR within regions of the brainstem that receive carotid  
74 body afferent input responses<sup>5</sup>, rather than at the level of the carotid bodies<sup>1-3</sup>, also  
75 suggests a role for the alternative CaMKK2 pathway, which has been proposed to  
76 contribute to energy balance regulation by hypothalamic networks<sup>22</sup>.

77 We set out to examine the mechanism by which AMPK is regulated in the context of the  
78 HVR. To this end we employed a three-point assay to assess the relationship between  
79 the level of LKB1 expression, carotid body activation during hypoxia and the HVR, by

80 utilising a mouse line which exhibits ~90% global hypomorphic expression of the gene  
81 that encodes LKB1 (*Stk11*, hereafter referred to as *Lkb1*)<sup>23, 24</sup> and a conditional  
82 homozygous LKB1 knockout mouse line derived from this in which 100% *Lkb1* deletion is  
83 triggered by Cre expression via the tyrosine hydroxylase (TH) promoter, which restricts  
84 *Lkb1* deletion to catecholaminergic cells including therein carotid body type I cells. We  
85 compared outcomes to those observed in mice where CaMKK2 had been deleted globally.  
86 The present investigation not only demonstrates that LKB1, but not CaMKK2, is required  
87 for the HVR, but also reveals that the level of LKB1 expression serves an essential role in  
88 establishing carotid body function and chemosensitivity. In short, we uncover a divergence  
89 in dependency on LKB1 and AMPK between the carotid body on the one hand and the  
90 HVR on the other. Adding to this we show that LKB1, but not AMPK, deficiency within  
91 catecholaminergic cells precipitates Cheyne-Stokes-like breathing patterns during  
92 hypoxia, which are associated with heart failure but of unknown aetiology<sup>25</sup>.

93  
94 **Results**  
95 **LKB1 deficiency augments while homozygous *Lkb1* gene deletion ablates type I**  
96 **cell activation in response to hypoxia** We confirmed that Cre expression and deletion  
97 of the gene encoding LKB1 was targeted to catecholaminergic cells by two means. Firstly,  
98 these mice were crossed with a mouse line expressing the Cre-inducible reporter gene  
99 Rosa (tdTomato), the expression of which in type I cells was assessed by confocal  
100 imaging of acutely isolated and fixed sections of tissue comprising the superior cervical  
101 ganglion, carotid artery and carotid body (**Fig 1a**; note, tyrosine hydroxylase is expressed  
102 by carotid body type I cells, endothelial cells and sympathetic neurons). Then, the  
103 absence of LKB1 expression was confirmed in acutely isolated carotid body type I cells

104 by single cell end point RT-PCR (**Fig 1b-c and Supplementary Fig 1**); consistent with  
105 outcomes for other organs including the brain<sup>23, 24</sup> LKB1 expression from homozygous  
106 *Lkb1* floxed mice (Ct = 31.147 ± 0.098, n = 3) was lower than for TH-Cre mice (Ct = 25.139  
107 ± 0.006, n = 3) in whole carotid bodies, although it should be noted that this multi-cellular  
108 organ is not representative of pure type I cells.

109 We next examined the impact of LKB1 deletion on carotid body type I cell function. To this  
110 end we employed TH-Cre mice as the control group, because these mice were used to  
111 deliver *Lkb1* deletion in catecholaminergic cells and there was no significant difference  
112 between the hypoxic ventilatory response of these mice when compared to the  
113 background strain (C57/BL6; **Supplementary Fig 2**). Changes in intracellular calcium  
114 concentration within isolated type I cells were assessed as an index of their activation by  
115 hypoxia, using the ratiometric calcium indicator Fura-2. Hypoxia (mean±SEM  $PO_2$  =  
116 20.19±1.73mmHg, ~2%  $O_2$  (n=10); from normoxia ~150mmHg, ~21%  $O_2$ ) induced a  
117 robust increase in Fura-2 fluorescence ratio in type I cells from TH-Cre mice (n = 8), which  
118 was equivalent to that resulting from voltage-gated calcium influx triggered by membrane  
119 depolarisation in response to extracellular application of 50mM potassium chloride (**Fig**  
120 **1di and e-g, Supplementary Fig 3**). Surprisingly, outcomes for type I cells from *Lkb1*  
121 floxed mice and *Lkb1* knockouts were not only different but opposite. Potassium-evoked  
122 calcium transients were markedly augmented in *Lkb1* floxed mice (n = 11; **Fig 1dii and**  
123 **e-g, Supplementary Fig 3**), which are hypomorphic with ~90% lower expression of LKB1  
124 globally when compared to wild type controls<sup>23</sup>. In marked contrast, hypoxia failed to  
125 increase intracellular calcium in type I cells from homozygous *Lkb1* knockouts (n = 8),  
126 where calcium transients evoked by 50mM potassium chloride were equivalent to controls  
127 (**Fig 1diii and e-g**).

128

129 **LKB1 deficiency attenuates while homozygous *Lkb1* deletion virtually abolishes**  
130 **increases in carotid body afferent discharge during hypoxia and hypercapnia**

131 Extracellular recordings of single unit activity from the carotid sinus nerve, showed that  
132 increases in afferent discharge frequency during hypoxia were attenuated in carotid  
133 bodies from *Lkb1* floxed mice, and virtually abolished in carotid bodies from *Lkb1*  
134 knockouts (**Fig 2a-b**).

135 During normoxia, basal afferent fibre discharge frequency from in-vitro carotid bodies of  
136 controls (TH-Cre, n=8) was similar to that of homozygous *Lkb1* floxed mice ( $p = 0.38$  by  
137 ANOVA;  $p = 0.17$  by Student's t test;  $n = 8$ ; **Fig 2d**) that exhibit ~90% global reductions in  
138 LKB1 expression<sup>23</sup>. By contrast, mean basal afferent discharge from carotid bodies of  
139 homozygous *Lkb1* knockouts (n=7) was reduced by approximately 70% (**Fig 2d**) which  
140 reached significance by Student's t test ( $p < 0.05$  versus TH-Cre) but not by ANOVA ( $p =$   
141  $0.09$  versus TH-Cre and  $p = 0.06$  vs *Lkb1* floxed).

142 Reductions in superfusate  $PO_2$  evoked exponential increases in afferent discharge from  
143 carotid bodies of controls and *Lkb1* floxed mice. Intriguingly, however, during hypoxia  
144 ( $PO_2 \leq 75$  mmHg) peak discharge frequencies of *Lkb1* floxed mice (~90% loss of LKB1  
145 expression) were attenuated by ~50% relative to controls (TH-Cre;  $p < 0.01$ ; **Fig 2c and e**).

146 Furthermore, the  $PO_2$  required to reach a frequency of 5 Hz was lower in the *Lkb1* floxed  
147 mice ( $70 \pm 7$  mmHg) compared to TH-Cre controls ( $96 \pm 4$  mmHg,  $p < 0.01$ ) (**Supplementary**  
148 **Fig 3**), indicative of a delay / lower  $PO_2$  threshold for response initiation. Exponential rate  
149 constants were consistent between TH-Cre and homozygous *Lkb1* floxed mice  
150 (**Supplementary Fig 3**). By contrast, reductions in superfusate  $PO_2$  evoked little or no  
151 increase in afferent discharge from carotid bodies of homozygous *Lkb1* knockouts (**Fig**

152 **2c and e**;  $p < 0.0001$  versus TH-Cre and  $p < 0.05$  versus *Lkb1* floxed), consistent with the  
153 fact that homozygous *Lkb1* deletion abolished type I cell activation during hypoxia. One  
154 can only assume that the ~50% reduction in hypoxia-evoked afferent discharge in carotid  
155 bodies isolated from *Lkb1* floxed mice was due to their ~90% deficiency in LKB1  
156 expression<sup>23</sup>, despite the fact that hypoxia-evoked calcium transients in isolated type I  
157 cells from these mice were augmented relative to controls (see **Fig 1**).

158 Our original assumption had been that LKB1 would primarily function to couple reductions  
159 in mitochondrial ATP supply to carotid body type I cell activation and thus carotid body  
160 afferent discharge during hypoxia. It was a surprise to find, therefore, that *Lkb1* deletion  
161 also attenuated carotid body activation during hypercapnia (**Fig. 3a**), given that carotid  
162 body responses to hypercapnia are generally presumed to be triggered by ion channel  
163 mechanisms independent of mitochondrial metabolism<sup>26-29</sup>, although earlier studies had  
164 provided pharmacological evidence that pointed to a partial dependence on mitochondria  
165 (see Discussion for further details)<sup>30</sup>. CO<sub>2</sub>-sensitivity (which is linear between 40 and 80  
166 mmHg) was largely preserved in the *Lkb1* floxed mice ( $n=6$ ,  $p = 0.38$  versus TH-Cre) but  
167 was virtually abolished in carotid bodies from homozygous *Lkb1* knockouts ( $n=4$ ) when  
168 compared to TH-Cre ( $p < 0.01$  versus TH-Cre;  $p < 0.06$  versus *Lkb1* floxed;  $n = 7$ ; **Fig 3b**  
169 **and c**).

170 In stark contrast, and consistent with our preliminary findings<sup>5</sup>, extracellular recordings of  
171 single unit activity from the carotid sinus nerve, showed that increases carotid body  
172 afferent responses to hypoxia in the *AMPK $\alpha$ 1+ $\alpha$ 2* homozygous knockouts ( $n=8$ ) remained  
173 comparable to TH-Cre ( $n=8$ ) and *AMPK $\alpha$ 1+ $\alpha$ 2* homozygous floxed ( $n = 10$ ) controls (**Fig**  
174 **4a-c**, **Supplementary Fig 4**; for single cell PCR see<sup>5</sup>). Basal discharge and peak



175 responses to hypoxia were similar between the three groups (**Fig 4a-c, Supplementary**  
176 **Fig 4**) although a significant reduction in basal discharge was detected for the  
177 *AMPK $\alpha$ 1+ $\alpha$ 2* homozygous knockouts when compared to *AMPK $\alpha$ 1+ $\alpha$ 2* homozygous  
178 floxed mice by Student's t test ( $p < 0.05$ ) but not ANOVA. The  $PO_2$  required to reach a  
179 frequency of 5Hz was reduced in the *AMPK $\alpha$ 1+ $\alpha$ 2* homozygous floxed mice ( $73 \pm 5$  mmHg,  
180  $p < 0.01$ ) and showed a similar trend in the *AMPK $\alpha$ 1+ $\alpha$ 2* homozygous knockouts ( $80 \pm 5$   
181 mmHg,  $p = 0.08$ ) compared to TH-Cre controls ( $96 \pm 4$  mmHg; **Supplementary Fig 4**).  
182 There was, however, no difference in the  $PO_2$  required to reach a frequency of 5Hz  
183 between *AMPK $\alpha$ 1+ $\alpha$ 2* homozygous floxed mice and *AMPK $\alpha$ 1+ $\alpha$ 2* homozygous  
184 knockouts. Exponential rate constants were consistent between the three groups  
185 (**Supplementary Fig 4**). Moreover, carotid body responses to hypercapnia and  
186  $CO_2$ -sensitivity remained unaltered in *AMPK $\alpha$ 1+ $\alpha$ 2* homozygous knockouts ( $n=9$ )  
187 compared to TH-Cre ( $n=7$ ) and *AMPK $\alpha$ 1+ $\alpha$ 2* homozygous floxed mice ( $n=9$ ; **Fig 4d-f,**  
188 **Supplementary Fig 4**).

189 Taken together, these findings suggest that LKB1 establishes, independent of AMPK,  
190 carotid body sensitivity to hypoxia and hypercapnia through a related mechanism, the set  
191 point of which can be adjusted by changes in LKB1 expression. By contrast, within type I  
192 cells AMPK may support an inhibitory input on basal afferent discharge during normoxia.

193  
194 **The HVR is attenuated in mice with LKB1 deficiency but remains unaffected**  
195 **following *Camkk2* deletion** Under normoxia there was no difference between controls  
196 and either *Lkb1*, *Camkk2* or, as previously shown<sup>5</sup>, dual *AMPK $\alpha$ 1+ $\alpha$ 2* knockouts with  
197 respect to breathing frequency, tidal volume, minute ventilation, blood gases, blood pH or

198 core body temperature (**Supplementary Fig 5 and Table 1**). Moreover, the metabolic  
199 status of *Lkb1* floxed mice is normal<sup>23</sup>. Nevertheless, profound genotype-specific  
200 differences were observed with respect to the ventilatory responses during hypoxia, and  
201 to a lesser extent during hypercapnia (**Supplementary Movies 1-4**).

202 During exposures to poikilocapnic hypoxia the peak of the initial "Augmenting Phase" of  
203 the HVR (~30s) remained unaffected in *Lkb1* floxed mice (12% O<sub>2</sub>, n = 14; 8% O<sub>2</sub>, n = 16)  
204 that harbour ~90% global reductions in LKB1 expression<sup>23</sup> when compared to TH-Cre  
205 (n=25). By contrast, the subsequent "Sustained Phase" (2-5 min) of the HVR was  
206 attenuated during severe poikilocapnic hypoxia (8% O<sub>2</sub>; p<0.0001 relative to TH-Cre;  
207 n=37) but not during moderate (12% O<sub>2</sub>; n = 25; 8% O<sub>2</sub>, n = 37) poikilocapnic hypoxia (**Fig**  
208 **5a-b**); i.e., these mice exhibited delayed hypoventilation during severe hypoxia.

209 The effect of conditional *Lkb1* deletion in catecholaminergic cells was more severe (**Fig**  
210 **5a-b**). The HVR was suppressed throughout 5min exposures to either mild (**Fig 5b**; 12%  
211 O<sub>2</sub>, n = 14) or severe hypoxia (**Fig 5b**; 8% O<sub>2</sub>, n = 15), and in a manner related to the  
212 severity of hypoxia. In marked contrast to the outcomes for mice with hypomorphic  
213 expression of LKB1, complete *Lkb1* deletion markedly attenuated the peak change in  
214 minute ventilation of the initial "Augmenting Phase" of the HVR during mild and severe  
215 hypoxia (at ~30s; p<0.0001 compared to TH-Cre), which is primarily driven by carotid  
216 body afferent input responses<sup>1, 31, 32</sup>. Following subsequent ventilatory depression (Roll  
217 Off, ~100s) the HVR was attenuated during mild hypoxia (p<0.0001, compared to  
218 TH-Cre), but this did not reach significance during severe hypoxia. However, the latter  
219 Sustained Phase of the HVR (2-5min) was markedly attenuated during mild (p<0.0001,  
220 compared to TH-Cre) and severe hypoxia (p<0.01, compared to TH-Cre). Note, the 0.05%  
221 CO<sub>2</sub> used here was probably insufficient to prevent respiratory alkalosis which may have

222 impacted on ventilatory reflexes during the latter phases of the sustained hypoxic stimulus  
223 <sup>33</sup>, in wild type mice in particular. Therefore, we may have underestimated the degree to  
224 which *Lkb1* deletion inhibits the HVR.

225 By contrast to the effects of *Lkb1* deletion, global deletion of *Camkk2* (n = 10) had no  
226 discernable effect on the HVR (**Supplementary Fig 6**), ruling out a prominent role for  
227 CaMKK2 in facilitating the acute HVR alone or through AMPK activation<sup>19</sup>.

228 More detailed analysis in *Lkb1* floxed mice identified attenuation of increases in breathing  
229 frequency at all time points during exposure to severe (8% O<sub>2</sub>, n = 22) but not mild hypoxia  
230 (12% O<sub>2</sub>, n = 15), including therein the Augmenting Phase (p<0.05 relative to TH-Cre),  
231 Roll Off (p<0.0001 relative to TH-Cre) and the Sustained Phase (p<0.0001 relative to  
232 TH-Cre). Increases in breathing frequency during hypoxia were yet more markedly  
233 attenuated by homozygous *Lkb1* deletion throughout exposures to both mild and severe  
234 hypoxia (p<0.0001 relative to TH-Cre; **Fig 6a**), and in a manner proportional to the severity  
235 of hypoxia. By contrast no attenuation of increases in tidal volume was observed for either  
236 *Lkb1* floxed mice or *Lkb1* knockouts during mild or severe hypoxia (**Figure 6b**). In fact,  
237 during severe hypoxia *Lkb1* deletion in catecholaminergic cells, but not hypomorphic  
238 expression of LKB1, appeared to augment increases in tidal volume during Roll Off and  
239 the Sustained Phase (p<0.01 relative to TH-Cre), but not during the initial Augmenting  
240 Phase.

241 Conditional deletion of *AMPK $\alpha$ 1+ $\alpha$ 2* in catecholaminergic cells also attenuated increases  
242 in breathing frequency, but not tidal volume, when these mice were exposed to mild  
243 hypoxia (12% O<sub>2</sub>; **Fig 6a-b**; n = 30) including therein the Augmenting Phase (p<0.0001  
244 relative to TH-Cre), Roll Off (p<0.0001 for 12% O<sub>2</sub>; p<0.001 for 8% O<sub>2</sub>; relative to TH-Cre)  
245 and the Sustained Phase (p<0.0001 relative to TH-Cre). By contrast to the impact of *Lkb1*

246 deletion, however, *AMPK $\alpha$ 1+ $\alpha$ 2* deletion attenuated increases in tidal volume as well as  
247 increases in breathing frequency during severe hypoxia (8% O<sub>2</sub>; n = 26)<sup>5</sup>, including therein  
248 the Augmenting Phase (p<0.05 relative to TH-Cre for tidal volume and p<0.0001 for  
249 breathing frequency), Roll Off (p<0.001 relative to TH-Cre) and the Sustained Phase  
250 (p<0.0001 relative to TH-Cre).

251 Taken together these findings strongly suggest that LKB1 and AMPK facilitate the HVR  
252 and oppose respiratory depression during hypoxia. However, outcomes indicate that  
253 those catecholaminergic circuit mechanisms that mediate hypoxia-evoked increases in  
254 tidal volume are afforded greater protection from the impact of LKB1 and AMPK deficiency  
255 than those delivering increases in breathing frequency.

256  
257 ***Lkb1* deletion causes marked ventilatory instability, apnoea and**  
258 **Cheyne-Stokes-like breathing during hypoxia.**

259 Unlike our previously reported findings in mice with *AMPK $\alpha$ 1+ $\alpha$ 2* deletion<sup>5</sup>, average  
260 measures (excluding apnoeas) for *Lkb1* knockouts indicated significant augmentation  
261 rather than attenuation of increases in tidal volume during severe hypoxia, as mentioned  
262 above (**Fig 6b**). Closer inspection revealed that attenuation of the HVR in *Lkb1* knockouts  
263 during exposure to severe hypoxia was associated with periods of Cheyne-Stokes-like  
264 breathing (CSB), where tidal volume exhibited marked sinusoidal variations with time (**Fig**  
265 **7a-b; Supplementary Movie 2**). CSB in *Lkb1* knockout mice was generally separated by  
266 periods of hypoventilation interspersed with frequent, prolonged apnoeas ( $\leq$ 4s). Unlike  
267 CSB, hypoventilation and apnoea were observed during mild and severe hypoxia.  
268 Increases in apnoea frequency (p<0.05 for 12% O<sub>2</sub> and p<0.0001 for 8% O<sub>2</sub>), apnoea  
269 duration (p<0.0001) and apnoea duration index (frequency x duration; p <0.0001) were

270 all significantly greater than for controls (TH-Cre; **Fig 7c-e**). As we have observed with  
271 respect to minute ventilation these measures also increased in a manner directly related  
272 to the severity of hypoxia. Moreover, CSB and increases in apnoea frequency and  
273 duration observed during severe hypoxia were completely reversed by hypercapnic  
274 hypoxia (**Fig 7a**); **Supplementary Movie 3**), likely due to improved oxygen supply  
275 consequent to increases in ventilation (see below). Therefore, the appearance of CSB  
276 likely accounts for measured increases in tidal volume for *Lkb1* knockout mice relative to  
277 controls, despite the appearance of frequent prolonged apnoeas and lengthy intervening  
278 periods of pronounced hypoventilation, that are highlighted by Poincaré plots of  
279 inter-breath interval (BB<sub>n</sub>) versus subsequent inter-breath interval (BB<sub>n+1</sub>;  
280 **Supplementary Fig 7 and 8**).

281 In this context, it is interesting to note that hypoxia-evoked CSB in *Lkb1* knockouts  
282 occurred irrespective of whether they were preceded by spontaneous or post-sigh  
283 apnoeas (**Fig 7b**). Moreover frequent and prolonged spontaneous and post-sigh apnoeas  
284 were also observed in *AMPK-α1+α2* knockouts, where CSB is absent during 5min  
285 (**Supplementary Movie 4**)<sup>5</sup> or even 10min (**Supplementary Fig 9**) exposures to severe  
286 hypoxia. Therefore, if sighs were triggered by hypoxia at a given threshold<sup>34</sup>, central  
287 hypoxia is likely no more severe for *Lkb1* when compared to *AMPKα1+α2* knockouts. CSB  
288 is thus most likely a consequence of LKB1 deficiency in type I cells and downstream  
289 catecholaminergic cardiorespiratory networks.

290  
291 **Conditional *Lkb1* deletion slows the ventilatory response to hypercapnia and**  
292 **hypercapnic hypoxia** The ventilatory response to hypercapnic hypoxia (8% O<sub>2</sub> + 5%  
293 CO<sub>2</sub>; n = 15) in *Lkb1* knockouts was attenuated, but only during the rising phase (**Fig 8a**;

294  $p < 0.01$  relative to TH-Cre,  $n = 17$ ). In short, *Lkb1* deletion slowed the rising phase of the  
295 response to this stimulus but did not affect the peak achieved. It is conceivable that the  
296 slow rise in this response may result from the residual attenuation of ventilatory responses  
297 to hypoxia that are not compensated for by increased central hypercapnic ventilatory  
298 drive. However, the rise in minute ventilation during exposure to hypercapnia alone (5%  
299  $\text{CO}_2$ ;  $n = 20$ ) was also slower for *Lkb1* knockouts relative to controls ( $p < 0.05$  relative to  
300 TH-Cre,  $n = 20$ ), but thereafter achieved an equivalent magnitude (**Fig 8b**) through  
301 increases in both respiratory frequency and tidal volume (**Supplementary Fig 10**). By  
302 contrast, mice with *AMPK $\alpha$ 1+ $\alpha$ 2* deletion exhibited no such delay in onset of hypercapnic  
303 ( $n = 23$ ) or hypoxic hypercapnic ( $n = 22$ ) ventilatory responses<sup>5</sup> (**Fig 8a-b**). The most likely  
304 explanation for these findings, therefore, is loss of carotid body chemoafferent input  
305 responses in *Lkb1* knockouts. This is in accordance with our aforementioned finding that  
306 hypoxia- and hypercapnia-evoked increases in afferent discharge were virtually abolished  
307 in carotid bodies from *Lkb1* knockouts and the generally held view that carotid body  
308 chemoafferent input responses drive the augmenting phase of the HVR<sup>31, 35</sup>.

309  
310 **The rank order of severity for attenuation of carotid body activation and attenuation**  
311 **of the HVR by LKB1 and AMPK is different** Peak afferent discharge from the carotid  
312 body during hypoxia remained unaffected following dual *AMPK $\alpha$ 1+ $\alpha$ 2* deletion<sup>5</sup>, while  
313 hypomorphic expression of LKB1 modestly attenuated increases afferent fibre discharge  
314 from the carotid body during hypoxia and *Lkb1* deletion virtually abolished carotid body  
315 afferent discharge during normoxia and hypoxia. By contrast, the Sustained Phase of the  
316 HVR during severe hypoxia was modestly attenuated by hypomorphic expression of *Lkb1*,  
317 markedly attenuated by homozygous *Lkb1* deletion but most severely attenuated by

318 *AMPK $\alpha$ 1+ $\alpha$ 2* deletion. In short, the rank order by degree of inhibition of peak carotid body  
319 afferent fibre discharge during hypoxia on the one hand and the sustained phase of the  
320 HVR on the other is different (**Supplementary Fig 11**).

321

## 322 **Discussion**

323 The present study identifies an essential role for LKB1 in establishing carotid body function  
324 and chemosensitivity, where the level of LKB1 expression determines a set-point about  
325 which carotid body afferent discharge is modulated by hypoxia and hypercapnia. This  
326 strongly suggests that the metabolic signalling pathway(s) that mediates the response of  
327 carotid body type I cells to hypoxia cannot be attenuated without affecting CO<sub>2</sub> sensitivity.  
328 Moreover, we have uncovered a divergence in dependency on LKB1 and AMPK between  
329 the carotid body on the one the hand and the hypoxic ventilatory response (HVR) on the  
330 other (**Fig 9**).

331 Deletion of LKB1, but not AMPK, in type I cells attenuated basal carotid body afferent  
332 discharge during normoxia and virtually abolished carotid body afferent input responses  
333 during hypoxia and hypercapnia, the latter of which was not thought to be determined by  
334 changes in mitochondrial metabolism<sup>26-29</sup>. Carotid bodies of mice that are ~90%  
335 hypomorphic for LKB1 expression in all cells (homozygous *Lkb1* floxed<sup>23</sup>) also exhibited  
336 significantly attenuated (~50%) peak carotid body afferent discharge during hypoxia.  
337 Accordingly, homozygous *Lkb1* deletion abolished hypoxia-evoked cytoplasmic calcium  
338 transients in type I cells. Paradoxically, however, in type I cells from mice that were ~90%  
339 hypomorphic for LKB1 expression, hypoxia-evoked calcium transients were not only  
340 retained but augmented relative to controls. This suggests that the level of LKB1  
341 expression determines a set point about which type I cells are activated by hypoxia and

342 hypercapnia, and that membrane depolarisation and exocytotic transmitter release are  
343 differentially sensitive to this.

344 It has been proposed that afferent discharge during hypoxia could, at least in part, be  
345 initiated by falls in type I cell cytoplasmic ATP<sup>36</sup> (although other mechanisms have also  
346 been considered<sup>37</sup>), which could trigger membrane depolarisation<sup>36</sup> and consequent  
347 exocytotic release of vesicular ATP to induce increases in afferent discharge<sup>38, 39</sup>. It is  
348 intriguing to note, therefore, that previous studies on the effects of *Lkb1* deletion have  
349 identified changes mitochondrial activities and consequent reductions in ATP levels and  
350 increases in AMP:ATP and ADP:ATP ratios in a variety of cell types, including skeletal  
351 muscle<sup>23</sup>, cardiac muscle<sup>24, 40</sup>, pancreatic beta cells<sup>41 42</sup>, regulatory T Cells<sup>43</sup> and MIN6  
352 cells<sup>41</sup>. More importantly still, it has been demonstrated that ATP levels are lower in  
353 cardiac muscle from hypomorphic *Lkb1* floxed mice under normoxia, lower still in hearts  
354 from mice with cardiac-specific *Lkb1* deletion and that in each case ATP levels decline  
355 further during ischaemia<sup>24</sup>. Thus, LKB1 may maintain in an expression-dependent  
356 manner the capacity for ATP synthesis within most cells, including therein carotid body  
357 type I cells where ATP deficiency might ultimately impact on the capacity for uptake of  
358 ATP by synaptic vesicles and/or exocytotic release of ATP. This view gains indirect  
359 support from our finding that *Lkb1* deletion, but not hypomorphic expression of LKB1,  
360 showed signs of reducing basal afferent discharge during normoxia, while peak afferent  
361 discharge was mildly attenuated by hypomorphic expression of LKB1 (~50%) and virtually  
362 abolished by *Lkb1* deletion. Further indirect support is provided by a previous study on rat  
363 carotid bodies, which showed that exocytotic release of adenosine represents the  
364 principal transmitter contributing to carotid body afferent discharge during mild hypoxia,  
365 while ATP acts as the principal transmitter driving afferent discharge during severe



366 hypoxia (i.e., peak discharge frequency)<sup>44</sup>. Although counter-intuitive, a lowering of ATP  
367 levels could also explain why hypoxia-evoked calcium transients were augmented in  
368 carotid body type I cells with hypomorphic expression of LKB1 yet blocked by homozygous  
369 *Lkb1* deletion, if mid-range reductions in basal ATP levels confer increased sensitivity of  
370 TASK1/3 channels to inhibition by hypoxia as previously proposed by others<sup>36</sup>, without  
371 greatly compromising the capacity for exocytotic ATP release. Further reductions in ATP  
372 availability upon homozygous *Lkb1* deletion could then ultimately render these  
373 ATP-sensitive TASK1/3 channels inactive, abolish hypoxia-response coupling in type I  
374 cells<sup>16, 36, 45</sup> and greatly reduce vesicular uptake and exocytotic ATP release<sup>38, 39</sup>. This  
375 would also impact on type I cell activation by hypercapnia, due to the fact that this too is  
376 in great part mediated by inhibition of TASK1/3 channels through acidosis and consequent  
377 induction of exocytotic release of ATP, albeit in a manner independent of mitochondrial  
378 oxidative phosphorylation<sup>30</sup>. Indirect support for this proposal may be taken from the  
379 previous finding of others that inhibition of mitochondrial oxidative phosphorylation  
380 (oligomycin and antimycin A) in cat carotid bodies in-situ blocked responses to hypoxia  
381 and enhanced responses to hypercapnia *in-vivo*<sup>30</sup>. If LKB1 deficiency did not reduce ATP  
382 availability, then one would expect similarly augmented changes in afferent discharge in  
383 response to hypercapnia rather than the decreases reported here. It is also notable that  
384 *Lkb1* deletion in pancreatic beta cells is associated with lower glucose-induced ATP  
385 accumulation, enhanced membrane excitability and increased glucose-stimulated insulin  
386 release<sup>41, 42</sup>. That said it is possible that LKB1 deficiency may increase or reduce other  
387 metabolic intermediates that might also impact type I cell responses to hypercapnia and  
388 thus O<sub>2</sub>:CO<sub>2</sub> stimulus interaction<sup>27, 46</sup>. Either way, the precise AMPK-independent  
389 mechanism(s) by which LKB1 may "rewire cell metabolism" remains to be determined.

390 However, it is intriguing to note that LKB1 can coordinate glucose homeostasis<sup>41, 47, 48</sup>  
391 and mitochondrial function through either a direct action<sup>41, 49, 50</sup>, or indirectly through  
392 constitutive phosphorylation of one or more of the eleven AMPK-related kinases it  
393 regulates<sup>13, 51, 52</sup>.

394 In line with the above, the HVR was attenuated in hypomorphic *Lkb1* floxed and  
395 homozygous *Lkb1* knockout mice in a manner related to the degree of LKB1 deficiency.  
396 By contrast, the HVR remained unaffected in global *Camkk2* knockouts. In short, LKB1  
397 and AMPK signalling pathways are critical to the maintenance of breathing and oxygen  
398 supply during hypoxia<sup>53</sup>, and act in concert to oppose ventilatory depression,  
399 hypoventilation and apnoea<sup>5</sup>.

400 We previously reported that dual *AMPK $\alpha$ 1+ $\alpha$ 2* deletion in catecholaminergic cells blocked  
401 the HVR, with no discernable effect on carotid body afferent input responses to hypoxia<sup>5</sup>.  
402 The data presented here confirm this finding and show that carotid body CO<sub>2</sub> sensitivity  
403 remained unaltered following *AMPK $\alpha$ 1+ $\alpha$ 2* deletion. Therefore, our present findings  
404 support the idea that severe hypoventilation and apnoea observed during hypoxia in  
405 *AMPK $\alpha$ 1+ $\alpha$ 2* knockout mice is due to dysfunction of central respiratory networks rather  
406 than any depletion of carotid body activity.

407 It is evident that *Lkb1* deletion in catecholaminergic neurons attenuated all phases of the  
408 HVR during mild (12% O<sub>2</sub>) and severe (8% O<sub>2</sub>) hypoxia, to a greater degree than with  
409 hypomorphic expression of LKB1 but less so than previously observed during severe  
410 hypoxia following *AMPK $\alpha$ 1+ $\alpha$ 2* deletion, even though carotid body afferent input  
411 responses were retained in *AMPK $\alpha$ 1+ $\alpha$ 2* knockouts<sup>5</sup>. In this respect, it is interesting to  
412 note that deficits in minute ventilation were evident for *Lkb1* floxed mice during the late  
413 Sustained Phase but not the Augmenting Phase of the HVR during severe hypoxia. This

414 is consistent with the effect of *AMPK $\alpha$ 1+ $\alpha$ 2* deletion during mild hypoxia. Outcomes for  
415 *Lkb1* floxed mice and *AMPK $\alpha$ 1+ $\alpha$ 2* knockouts therefore add further weight to our proposal  
416 that they exert an inhibitory effect downstream of chemoafferent input responses, if one  
417 accepts the view that increases in carotid body afferent discharge drive the Augmenting  
418 Phase of the HVR <sup>31, 35</sup> while direct modulation by hypoxia of brainstem respiratory  
419 networks aids maintenance of the HVR in the longer term <sup>1, 5, 32, 35, 54, 55</sup>. Further support  
420 for this proposal is provided by the rank order by severity of hypoxic ventilatory and carotid  
421 body dysfunction, respectively. During severe hypoxia the HVR is inversely related to the  
422 degree of LKB1 deficiency but was most markedly inhibited following *AMPK $\alpha$ 1+ $\alpha$ 2*  
423 deletion<sup>5</sup>, despite the fact that carotid body afferent discharge during hypoxia (and  
424 hypercapnia) was attenuated in a manner directly related to the degree of *Lkb1* deletion  
425 but remained unaffected following *AMPK $\alpha$ 1+ $\alpha$ 2* deletion.

426 When taken together these data strongly suggest that LKB1 determines, independent of  
427 AMPK, a set-point about which carotid body afferent input responses are delivered during  
428 hypoxia and provide further strong support for our previous proposal that LKB1-AMPK  
429 signalling pathways facilitate the HVR at the brainstem. In this way LKB1 and AMPK may  
430 exert independent influences on peripheral <sup>27, 46</sup> and central <sup>31, 35, 55, 56</sup> stimulus interactions.  
431 Accordingly, the rising phase of the hypercapnic and hypoxic-hypercapnic ventilatory  
432 responses was slowed in *Lkb1* knockouts, while by contrast the peak of the Sustained  
433 Phase of both responses remained unaltered despite marked attenuation of afferent input  
434 responses to hypercapnia.

435 This is a major point because homozygous *Lkb1* deletion led to marked reductions in  
436 breathing frequency (excluding apnoeas) that were coupled with erratic “augmentation” of  
437 tidal volume responses during severe hypoxia, consequent to induction of periodic

438 Cheyne-Stokes-like breathing patterns. Cheyne-Stokes-like breathing patterns were  
439 never observed in mice with either ~90% global hypomorphic *LKB1* expression or  
440 *AMPK $\alpha$ 1+ $\alpha$ 2* deletion in catecholaminergic cells. A critical distinguishing factor in this  
441 respect may therefore be the block by *Lkb1* deletion of not only carotid body afferent input  
442 responses to hypoxia and hypercapnia, but also concomitant attenuation of downstream  
443 hypoxia-responsive circuit mechanisms. This suggests that Cheyne-Stokes breathing  
444 may occur consequent to energy crises in peripheral and central catecholaminergic  
445 respiratory control networks. That said, others have proposed that Cheyne-Stokes  
446 breathing is triggered by hyperactivity of carotid bodies and thus augmented afferent input  
447 responses when associated with heart failure<sup>57</sup>. One possible explanation for these  
448 contradictory observations could be that enhanced carotid body afferent input responses  
449 after heart failure occur consequent to central metabolic crisis that results in abject failure  
450 of both central integration of afferent inputs and efferent ventilatory output. In other words,  
451 increases in controller gain within the central respiratory networks could trigger  
452 Cheyne-Stokes breathing by enhancing the sensitivity to, and thus the degree of activation  
453 of central CO<sub>2</sub>-sensing neurons during hypercapnia<sup>31</sup> consequent to hypoventilation and  
454 apnoea during hypoxia. Consistent with this view, others have proposed that  
455 Cheyne-Stokes breathing may be caused by enhanced hypercapnic ventilatory responses  
456 driven by instability within respiratory networks consequent to augmented chemoreflex  
457 gain, prolonged feedback delay<sup>58</sup> and/or enhanced central controller gain<sup>59</sup>.

458 The more extreme patterns of non-rhythmic (ataxic) ventilation observed for *AMPK $\alpha$ 1+ $\alpha$ 2*  
459 knockouts<sup>5</sup> may thus be avoided. While unlikely it is also conceivable that retention by  
460 *Lkb1* knockouts of greater capacity for rhythmic ventilation during hypoxia could be  
461 conferred by residual allosteric AMPK activation by AMP in central hypoxia-responsive

462 respiratory networks<sup>60</sup>, where falls in cellular ATP supply would be associated with ADP  
463 accumulation and consequent increases in the AMP:ATP ratio via the adenylate kinase  
464 reaction. This could conceivably maintain oscillating central respiratory drive in a manner  
465 triggered periodically once a given severity of central hypoxia is breached. That said,  
466 central hypoxia is likely no more severe for *Lkb1* when compared to *AMPK $\alpha$ 1+ $\alpha$ 2*  
467 knockouts because: (1) hypoxia-evoked sighs<sup>34, 61</sup> were observed in *Lkb1* and  
468 *AMPK $\alpha$ 1+ $\alpha$ 2* knockouts; (2) apnoeas were shorter and less frequent for *Lkb1* knockouts  
469 when compared to *AMPK $\alpha$ 1+ $\alpha$ 2* knockouts<sup>5</sup>; (3) Cheyne-Stokes-like breathing between  
470 apnoeas would periodically raise oxygen supply in *Lkb1* knockouts.

471 In conclusion, the present study reveals that the level of LKB1 expression is essential for  
472 establishing carotid body function and for initiating the HVR. In this respect LKB1 and  
473 AMPK provide for hierarchical control of the hypoxia-responsive respiratory network (**Fig**  
474 **9**). Firstly, the level of LKB1 expression determines, independent of AMPK, a set-point  
475 about which carotid body afferent input responses are evoked during hypoxia and  
476 hypercapnia, rather than contributing to oxygen-sensing *per se*. Thereafter LKB1-AMPK  
477 signalling pathways likely govern coincidence detection and signal integration within an  
478 hypoxia-responsive circuit downstream of the carotid bodies, that encompasses, at the  
479 very least, the brainstem nucleus of the solitary tract<sup>5</sup>. Afferent input responses and  
480 brainstem hypoxia could thereby determine, each in part, the set-point about which AMPK  
481 and thus brainstem respiratory networks are activated during hypoxia. Subsequently,  
482 AMPK-dependent modulation of cellular metabolism<sup>60</sup>, ion channels<sup>62, 63</sup> and thereby  
483 neuronal activities<sup>64, 65</sup> may facilitate afferent inputs and thus efferent outputs leading to  
484 increases in ventilatory drive during hypoxia. Consequently, LKB1 and/or AMPK  
485 deficiency may contribute to central sleep apnoea associated with metabolic

486 syndrome-related disorders <sup>66</sup>, ascent to altitude <sup>67</sup> and apnoea of prematurity <sup>68</sup>. By  
487 contrast, Cheyne-Stokes breathing and central sleep apnoea <sup>58</sup> associated with heart  
488 failure <sup>57</sup> may be conferred by LKB1 deficiency and/or metabolic crises across peripheral  
489 and central hypoxia-responsive respiratory networks. Further studies are therefore  
490 warranted to elucidate the downstream AMPK-independent targets by which LKB1  
491 establishes carotid body function.

492

## 493 **Methods**

494 Experiments were approved by local ethical review committees and the University Director  
495 of Veterinary Services at the University of Edinburgh, and by the UK Home Office  
496 (Science). All procedures were covered by a UK Home Office Project Licence  
497 (PBA4DCF9D). All genetically modified mice tested here were bred on a C57 Black 6  
498 (C57/BL6) background. Furthermore, all studies complied with the regulations of the  
499 United Kingdom Animals (Scientific Procedures) Act of 1986.

500

## 501 **Breeding of mice, genotyping and single cell PCR**

502 Standard approaches were used for breeding of mice and brother/sister mating was  
503 avoided. All mice studied were between 3-12 months of age.

504 Because global deletion of the gene encoding LKB1 (*Stk11*, *Lkb1*) or dual deletion of the  
505 genes encoding AMPK $\alpha$ 1 (*Prkaa1*) and AMPK $\alpha$ 2 (*Prkaa2*) is embryonic lethal, we  
506 employed knockdown and/or conditional deletion strategies. For *Lkb1* deletion we used  
507 floxed mice in which exons 5-7 of this gene had been replaced by a cDNA cassette  
508 encoding equivalent exon sequences where exon 4 and the cDNA cassette were flanked  
509 by loxP sequences, which in their own right deliver ~90% global knockdown of LKB1

510 expression<sup>23</sup>. For *AMPK $\alpha$ 1+ $\alpha$ 2* deletion critical exons of the *AMPK $\alpha$ 1* and *AMPK $\alpha$ 2* genes  
511 were flanked by loxP sequences<sup>69</sup>. Each floxed mouse line was crossed, as previously  
512 described<sup>5</sup>, with mice expressing Cre recombinase under the control of the tyrosine  
513 hydroxylase (TH) promoter (Th-IRES-Cre; EM:00254), providing for gene deletion in all  
514 catecholaminergic cells inclusive of those cells that constitute the hypoxia-responsive  
515 respiratory network from carotid body<sup>70</sup> to brainstem<sup>71</sup>. Transient developmental  
516 expression of TH does occur in disparate cell types that do not express TH in the adult<sup>72</sup>,  
517 such as dorsal root ganglion cells and pancreatic islets, but these do not contribute to the  
518 acute HVR. We previously confirmed restriction of Cre expression to TH-positive cells in  
519 the adult mouse by viral transfection of a Cre-inducible vector carrying a reporter gene<sup>5</sup>.  
520 Therefore, our approach overcomes embryonic lethality and allows, unforeseen ectopic  
521 Cre expression aside, for greater discrimination of circuit mechanisms than would be  
522 provided for by global knockouts. The role of CaMKK2 in the HVR was determined by  
523 assessing mice with global deletion of the corresponding gene (*Camkk2*)<sup>22</sup>.  
524 Male *Lkb1*<sup>flx/flx</sup> mice are infertile. To overcome this issue female *Lkb1*<sup>flx/flx</sup> mice were  
525 crossed with heterozygous male TH-Cre<sup>+/-</sup> mice. Heterozygous males of the *Lkb1*<sup>flx/wt</sup>  
526 Cre<sup>+/-</sup> genotype were then backcrossed with female homozygous *Lkb1*<sup>flx/flx</sup> Cre<sup>+/-</sup> mice to  
527 obtain the required *Lkb1*<sup>flx/flx</sup> Cre<sup>+/-</sup> mice to study. Wild type or floxed *Lkb1* alleles were  
528 detected using two primers, p200, 5'-CCAGCCTTCTGACTCTCAGG-3' and p201, 5'-  
529 GTAGGTATTCCAGGCCGTCA-3'. For the detection of Cre recombinase we employed:  
530 TH3, 5'-CTTTCCTTCCTTTATTGAGAT-3', TH5, 5'-CACCTGACCCAAGCACT-3' and  
531 Cre-UD, 5'-GATACCTGGCCTGGTCTCG-3'. As homozygous *Lkb1* floxed mice are  
532 hypomorphic, exhibiting ~90% lower LKB1 expression than *Lkb1* wild type littermates<sup>23</sup>,

533 we used as controls mice that express Cre via the tyrosine hydroxylase promoter  
534 (TH-Cre).

535 For deletion of the gene that encodes CaMKK2 (*CamKK2*) wild type alleles were detected  
536 using two primers, KKBeta1, 5'CAGCACTCAGCTCCAATCAA3', and KKBeta2,  
537 5'GCCACCTATTGCC TTGTTTG3'.

538 Lastly, we used two primers for each AMPK catalytic subunit:  $\alpha$ 1-forward: 5'  
539 TATTGCTGCCATTAGGCTAC 3',  $\alpha$ 1-reverse: 5'  
540 GACCTGACAGAATAGGATATGCCCAACCTC 3';  $\alpha$ 2-forward 5'  
541 GCTTAGCACGTTACCCTGGATGG 3',  $\alpha$ 2-reverse: 5'  
542 GTTATCAGCCCAACTAATTACAC 3'.

543 We detected the presence of wild-type or floxed alleles *and* Cre-recombinase by PCR.  
544 The PCR protocol used for all genotype primers was: 92°C for 5min, 92°C for 45s, 56°C  
545 for 45s, 72°C for 60s, and 72°C for 7min for 35 cycles and then 4°C as the holding  
546 temperature. 15 $\mu$ l samples were run on 2% agarose gels with 10 $\mu$ l SYBR®Safe DNA Gel  
547 Stain (Invitrogen) in TBE buffer against a 100 bp DNA ladder (GeneRuler™, Fermentas)  
548 using a Model 200/2.0 Power Supply (Bio-Rad). Gels were imaged using a Genius Bio  
549 Imaging System and GeneSnap software (Syngene).

550

### 551 **Type I cell isolation**

552 Carotid bodies were incubated at 37°C for 25-30min in isolation medium consisting of:  
553 0.125mg/ml Trypsin (Sigma), 2.5mg/ml collagenase Type 1 (Worthington) made up in low  
554 Ca<sup>2+</sup>/low Mg<sup>2+</sup> HBSS. During this incubation the carotid bodies were separated from the  
555 associated patch of artery. The carotid bodies were then transferred to low Ca<sup>2+</sup>/low Mg<sup>2+</sup>



556 HBSS containing trypsin inhibitor (0.5mg/ml) for 5min at room temperature, and then to  
557 2ml of pre-equilibrated (95% air, 5% CO<sub>2</sub>, 37°C) growth medium (F-12 Ham nutrient mix,  
558 10% fetal bovine serum, 1% penicillin/streptomycin). The medium containing the carotid  
559 bodies was centrifuged and the pellet re-suspended in 100µl of growth medium. Carotid  
560 bodies were then disrupted by triturating using fire polished Pasteur pipettes, and type I  
561 cells used within 4 hr.

562

### 563 **Confocal and Immunofluorescence imaging**

564 To aid confirmation that *Lkb1* deletion had been induced in carotid body type I cells, mice  
565 with TH-Cre driven gene deletion were crossed with mice engineered for Cre-dependent  
566 expression of tdTomato (excitation 555 nm, emission 582 nm) from the Rosa26 locus.  
567 These mice were deeply anaesthetised using 2g/kg Pentobarbital Sodium (Merial) and  
568 carotid bifurcations containing the carotid body tissue dissected out. Bifurcations were  
569 briefly washed in ice-cold saline, fixed in 4% paraformaldehyde in 0.1M phosphate buffer  
570 (PB; pH 7.4), post-fixed, and stored in 30% sucrose in 0.1M PB at 4°C. 5µm sections of  
571 the bifurcations were cut using a cryostat, collected on glass slides and air dried before  
572 being rinsed in 0.1M phosphate buffered saline (PBS) and glass coverslipped. Confocal  
573 z sections were acquired using a Nikon A1R + confocal system via a Nikon Eclipse Ti  
574 inverted microscope with a Nikon Apo 63Å~ λS DIC N2, 1.25 n.a. oil immersion objective  
575 (Nikon Instruments Europe BV, Netherlands). Image processing was carried out using  
576 Imaris (Bitplane, Oxford Instruments, UK) and Image J (Rasband WS. ImageJ, U.S.  
577 National Institutes of Health, Bethesda, MD, USA, [imagej.nih.gov/ij/](http://imagej.nih.gov/ij/), 1997–2012).

578

579 Additionally, carotid body type I cells were isolated and processed for

580 immunocytochemistry. Briefly, slides were washed in 0.1M phosphate buffered saline,  
581 incubated overnight in anti-TH (mouse; 1:1000 dilution; Merck Millipore MAB318) primary  
582 antibodies diluted in 2% v/v normal serum in 0.1M PB-T (0.3% v/v Triton™ X-100; Sigma),  
583 rinsed 3x for 5min in 0.1M PBS and incubated in fluorescent secondary antibodies (Alexa  
584 Fluor® 488; goat anti-mouse; 1:750 dilution; Thermo Fisher A-11034) for 2hr at room  
585 temperature. Slides were washed again, followed by incubation with DAPI (1 µg/ml) for  
586 5min at room temperature, 3x 5min washed with 0.1M PBS and glass coverslipped.

587

### 588 **Single-cell end-point PCR**

589 For single cell amplification, GoTaq DNA Polymerase (Promega) was added to 2-5µl of  
590 cDNA obtained from each single carotid body type I cell from wildtype and transgenic mice  
591 as well as the wildtype adrenomedullary chromaffin cells. To ensure the validity that the  
592 collected cells were indeed carotid body type I cells and adrenomedullary chromaffin cells,  
593 primers obtained from Qiagen were used to detect the expression of tyrosine hydroxylase  
594 (QuantiTect Primer Assay, QT00101962) with an expected band length of 92bp. The only  
595 cells considered for the expression studies were those that positively expressed tyrosine  
596 hydroxylase and where the negative controls were clean. Primers designed by Qiagen for  
597 LKB1 were not used as they detect area of the genes that are not within the floxed loxP  
598 sites, which may result in false positives appearing if mRNA transcript is still produced  
599 regardless of whether the targeted domain has been excised. Accordingly, primers were  
600 designed by using Primer-BLAST (NCBI) to detect a region that is known to be excised:  
601 FWD: 5'GCTCATGGGTA CTTCCGCCAGC 3'; REV:5'AGCAGGTTGCC CGGCTTGATG  
602 3'. 15µl samples along with a 100bp DNA Ladder (GeneRuler™, Fermentas) were run

603 on a 2% agarose gel made with SYBR®Safe DNA gel stain (Invitrogen). Gels were then  
604 imaged using a Genius Bio Imaging System and GeneSnap Software (Syngene).

605

### 606 **Quantitative RT-PCR**

607 RNA was extracted, quantified and reverse transcribed as described above. For qPCR  
608 analysis, 2.5µl of cDNA in RNase free water was made up to 25µl with FastStart Universal  
609 SYBR Green Master (ROX, 12.5µl, Roche), Ultra Pure Water (8µl, SIGMA) and forward  
610 and reverse primers for LKB1. The sample was then centrifuged and 25µl added to a  
611 MicroAmp™ Fast Optical 96-Well Reaction Plate (Greiner bio-one), the reaction plate  
612 sealed with an optical adhesive cover (Applied Biosystems) and the plate centrifuged. The  
613 reaction was then run on a sequence detection system (Applied Biosystems) using  
614 AmpliTaq Fast DNA Polymerase, with a 2min initial step at 50°C, followed by a 10min step  
615 at 95°C, then a 15s step at 95°C which was repeated 40 times. Then a dissociation stage  
616 with a 15s step at 95°C followed by a 20s at 60°C and a 15s step at 95°C. Negative  
617 controls included control cell aspirants for which no reverse transcriptase was added, and  
618 aspiration of extracellular medium and PCR controls. None of the controls produced any  
619 detectable amplicon, ruling out genomic or other contamination.

620

### 621 **Calcium imaging**

622 Type I cells were incubated in the standard perfusate with 4µM Fura-2 AM (Molecular  
623 Probes) at room temperature, washed and then placed in a temperature regulated  
624 perfusion chamber on a Nikon Diaphot 300 inverted phase contrast microscope. Cells  
625 were perfused with a solution consisting of (mM): NaCl (117), KCl (4.5), MgCl<sub>2</sub> (1), CaCl<sub>2</sub>  
626 (2.5), NaHCO<sub>3</sub> (23), Glucose (10), pH adjusted to 7.4 using 5% CO<sub>2</sub>. For normoxia

627 perfusate was bubbled with 5% CO<sub>2</sub> 95% air (~150mmHg). For hypoxia perfusate was  
628 bubbled with 5% CO<sub>2</sub>, 95 % nitrogen (~20mmHg).

629

### 630 **Extracellular recordings of carotid sinus nerve activity**

631 Single fibre chemoafferent activity was amplified, filtered and recorded using a 1401  
632 interface running Spike 2 software (Cambridge Electronic Design). Single- or few-fibre  
633 chemoafferent recordings were made from carotid bifurcations held in a small volume  
634 tissue bath (36-37°C), and superfused with gassed (95% O<sub>2</sub> and 5% CO<sub>2</sub>),  
635 bicarbonate-buffered saline solution (composition (mM): 125 NaCl, 3 KCl, 1.25 NaH<sub>2</sub>PO<sub>4</sub>,  
636 5 Na<sub>2</sub>SO<sub>4</sub>, 1.3 MgSO<sub>4</sub>, 24 NaHCO<sub>3</sub>, 2.4 CaCl<sub>2</sub>, pH 7.4). A standard O<sub>2</sub> electrode (ISO2;  
637 World Precision Instruments) was placed in the superfusate system at the point of entry  
638 to the recording chamber in order to continuously record the superfusate PO<sub>2</sub>. Flow  
639 meters with high precision valves (Cole Palmer Instruments) were used to equilibrate the  
640 superfusate with a desired gas mixture. Basal single fibre activity was monitored at a  
641 superfusate PO<sub>2</sub> of 200mmHg and a PCO<sub>2</sub> of 40mmHg. This PO<sub>2</sub> is slightly lower than  
642 that previously used for the rat carotid body<sup>73</sup> to take in account the smaller size of this  
643 organ in the mouse (and thus a smaller diffusion distance). At this superfusate PO<sub>2</sub>, the  
644 basal frequency in TH-Cre single/few fibres was consistent with that reported *in vivo* in  
645 other rodents<sup>74</sup> and so we interpret this PO<sub>2</sub> to have not been excessively hyperoxic.  
646 To induce responses to hypoxia, the superfusate PO<sub>2</sub> was slowly reduced to a minimum  
647 of 40mmHg or was reversed prior to this when the chemoafferent response had stabilised  
648 or had begun to diminish. The single fibre chemoafferent discharge frequency was plotted  
649 against the superfusate PO<sub>2</sub> over a desired range of superfusate PO<sub>2</sub> values. To produce

650 the hypoxic response curves, the data points were fitted to an exponential decay curve  
651 with offset, as shown below:

$$652 \quad y = a + be^{-cx}$$

653 For the above equation, y is the single fibre discharge frequency in Hz, x is the superfusate  
654  $PO_2$  in mmHg, a is the discharge frequency as the  $PO_2$  tends to infinity (offset), b is the  
655 discharge frequency when the  $PO_2$  is 0mmHg (minus the offset) and c is the exponential  
656 rate constant. Comparison of the exponential rate constants allowed for determination of  
657 any alteration in the rate of increase in chemoafferent frequency per mmHg reduction in  
658 the superfusate  $PO_2$ , upon hypoxic response initiation. Furthermore, for any given  
659 discharge frequency, the corresponding  $PO_2$  could be calculated using the inverse  
660 function of the exponential decay curve, as shown below:

$$661 \quad y = (\ln((x - a)/b))/-c$$

662 y is the  $PO_2$  in mmHg, x is the single fibre discharge frequency in Hz and a,b and c are  
663 constants as above. Specifically, superfusate  $PO_2$  levels were compared when the single  
664 fibre chemoafferent discharge frequency was at 5 Hz. This was chosen as it lies on the  
665 exponential region of the hypoxic response curve but is not of a magnitude at which the  
666 discharge is likely to have begun to diminish. This method was used to define any  $PO_2$   
667 shift in the hypoxic response curve thereby providing information of a potential change in  
668 the  $PO_2$  threshold required for hypoxic response initiation. Plots of firing frequency versus  
669 superfusate  $PO_2$  were fitted by non-linear regression (GraphPad Prism 6).

670 Chemoafferent responses to hypercapnia were induced by raising the superfusate  $PCO_2$   
671 from approximately 40 mmHg (pH 7.4) to 80 mmHg (pH 7.15) at a constant  $PO_2$  (200  
672 mmHg), as has been previously reported for the intact *in vitro* CB preparation<sup>75</sup>.

673

## 674 **Plethysmography**

675 For plethysmography mice were 6-12 months of age. Both males and females were  
676 studied. We used unrestrained whole-body plethysmography, incorporating a Halcyon™  
677 low noise pneumatochograph coupled to FinePointe acquisition and analysis software  
678 with a sampling frequency of 1kHz (Buxco Research Systems, UK). All quoted values for  
679 the HVR were derived from apnoea-free periods of ventilation. All measures reported are  
680 averages of n repeats from multiple mice (C57/BL6, 5 mice; TH-Cre, 5 mice; *Lkb1* floxed,  
681 4 mice; *Lkb1* knockout, 4 mice; CaMKK2 knockouts, 7 mice; AMPK- $\alpha$ 1/ $\alpha$ 2 floxed, 5 mice;  
682 AMPK- $\alpha$ 1/ $\alpha$ 2 floxed, 5 mice). Any unreliable and erratic respiratory waveforms recorded  
683 during gross un-ventilatory related body movements, i.e., sniffing and grooming, were  
684 avoided for measurements. Additionally, a rejection algorithm that was built into the  
685 plethysmography system (Buxco Electronics Inc.) identified periods of  
686 motion-induced-artefacts for omission. The patented Halycon™ low noise  
687 pneumotachograph (Buxco Electronics Inc.) reduces disturbances caused by air currents  
688 from outside the chambers (i.e., fans, closing doors, air conditioners, etc.), which can  
689 disrupt or overwhelm the ventilatory airflows within the chamber.

690 Mice were trained by repeated bi-weekly placement in the plethysmography chamber  
691 under normoxia and without experimental interventions, so that they became accustomed  
692 to the environment. During experimental work mice were placed in a freshly cleaned  
693 plethysmography chamber (to remove scent of previous mice) for a 10-20min acclimation  
694 period under normoxia (room air) to establish a period of quiet and reliable breathing for  
695 baseline-ventilation levels (this is also indicated by a measured rejection index of 0 by the  
696 FinePointe Acquisition and Analysis Software). Mice were then exposed to hypoxia (12%

697 or 8% O<sub>2</sub>, with 0.05% CO<sub>2</sub>, balanced with N<sub>2</sub>), hypoxia+hypercapnia (8% O<sub>2</sub>, 5% CO<sub>2</sub>,  
698 balanced with N<sub>2</sub>) or hypercapnia (21% O<sub>2</sub>, 5% CO<sub>2</sub>, balanced with N<sub>2</sub>) for 5min or 10min.  
699 Medical grade gas mixtures were chosen by switching a gas tap. The time for evacuation  
700 of the dead space and complete exchange of gas within the plethysmography chamber  
701 was 30s. The duration of exposure to hypoxia quoted was the actual duration of hypoxia.  
702 Apnoea was defined as cessations of breathing greater than the average duration,  
703 including interval, of 2 successive breaths (600ms) during normoxia, with a detection  
704 threshold of 0.25mmHg (SD of noise). Breathing variability was assessed by Poincaré  
705 plots and by calculating the SD of inter-breath (BB) intervals. The breathing frequency,  
706 tidal volume, and minute ventilation as derived by the FinePointe Software were also  
707 analysed for control and knockout mice. These parameters were measured as mean  
708 values taken over a 2s breathing period and not on a breath-to-breath basis. The changes  
709 in breathing frequency, tidal volume, and minute ventilation during hypoxia and/or  
710 hypercapnia were analysed as the percentage change from normoxia respective to each  
711 individual mouse. The peak of the augmenting phase was calculated from the peak value  
712 between 20-40s of the hypoxic and/or hypercapnic exposure that coincides with the peak  
713 of the rising phase. The roll off period was calculated as the lowest value between 60-140s  
714 of exposure and the sustained phase was calculated from the last 20s in the plateaued  
715 phase. A large time range was required for selection of these points as experiments were  
716 performed on unrestrained and awake animals and periods of no movement, sniffing, or  
717 grooming, were only considered.  
718 Apnoeas were excluded from all stated measures (mean±SEM) of breathing frequency,  
719 tidal volume and minute ventilation, i.e., all quoted values were derived from apnoea-free  
720 periods of ventilation.

721

722 **Statistics and Reproducibility**

723 Statistical comparison was completed using GraphPad Prism 6 as follows: Calcium  
724 imaging data were assessed by Student's t test; Afferent discharge was assessed by  
725 single or 2 factor ANOVA with Bonferroni Dunn post hoc analysis and by Student's t test;  
726 Plethysmography was assessed by one-way ANOVA with Bonferroni multiple  
727 comparison's test and by Student's t test;  $p < 0.05$  was considered significant. For afferent  
728 discharge and plethysmography all quoted values are for ANOVA unless stated otherwise.  
729 All data are presented as mean  $\pm$  SEM. All responses studied were robust to inter-animal  
730 variability and highly reproducible. Replicates for calcium imaging on isolated type I cells  
731 refer to independent studies on 8-11 different cells from at least three (3) different mice.  
732 For afferent fibre discharge replicates refer to studies on 4-10 different carotid bodies each  
733 from a different mouse. For plethysmography all measures reported are averages of n  
734 separate experiments on 4-7 mice spread over a six-month period from six months of age  
735 (C57/BL6, 5 mice; TH-Cre, 5 mice; *Lkb1* floxed, 4 mice; *Lkb1* knockout, 4 mice; CaMKK2  
736 knockouts, 7 mice; AMPK- $\alpha 1/\alpha 2$  floxed, 5 mice; AMPK- $\alpha 1/\alpha 2$  floxed, 5 mice). To ensure  
737 as few mice as possible were used to determine differences by significance test,  
738 experiments were conducted and acquired data statistically assessed in stages by the  
739 variable criteria sequential stopping rule (SSR). In this way animal use was minimised,  
740 power maximised and the probability of type I errors kept constant.

741

742 **Competing interests:** The authors declare no competing interests.

743



744 **Data availability statement:** All data generated or analysed during this study are  
745 included in this published article (and its supplementary information files).

746  
747 **Acknowledgements:** This work was primarily funded by a Wellcome Trust Programme  
748 Grant held by AME (WT081195MA), which also supported by subcontract the work of  
749 A.P.H and P.K. at the University of Birmingham. S.M. was supported by a University of  
750 Edinburgh PhD studentship and then by a BHF Programme Grant held by AME  
751 (RG/12/14/29885).

752  
753 **Author contributions:** A.M.E. conceived this study and developed the study plan in  
754 discussion with D.G.H.. A.M.E. and S.M. wrote the manuscript and made Figures 1-9.  
755 A.M.E. and S.M. developed the conditional knockout mice. S.M. and A.D.M designed and  
756 validated primers and performed genotyping. M.J.S., A.D.M., S.M. and A.M.E. performed  
757 single cell PCR. A.M.D., S.M., and A.M.E. performed plethysmography. S.M. and A.M.E.  
758 performed final analysis of respiratory data. S.M. and A.M.E. developed ROSA mice and  
759 performed confocal microscopy and immunocytochemistry. A.P.H. and P.K. performed  
760 afferent discharge and carried out data analysis blind, before final data compilation and  
761 interpretation by A.M.E. in discussion with S.M., A.P.H. and P.K.. M.L.D, A.M.D. and C.P.  
762 carried out and performed initial acquisition and analysis of calcium imaging blind, which  
763 was later compiled, tested and interpreted by A.M.E. in discussion with S.M.. All authors  
764 discussed their results and provided feedback on one or more drafts of this manuscript.

765  
766 **References**  
767 1. Teppema LJ and Dahan A. The ventilatory response to hypoxia in mammals:  
768 mechanisms, measurement, and analysis. *Physiol Rev.* 2010;90:675-754.

- 769 2. Kumar P and Prabhakar NR. Peripheral chemoreceptors: function and plasticity of  
770 the carotid body. *Compr Physiol*. 2012;2:141-219.
- 771 3. Iturriaga R, Alcayaga J, Chapleau MW and Somers VK. Carotid body  
772 chemoreceptors: physiology, pathology, and implications for health and disease. *Physiol*  
773 *Rev*. 2021;101:1177-1235.
- 774 4. Carling D. AMPK signalling in health and disease. *Curr Opin Cell Biol*. 2017;45:31-  
775 37.
- 776 5. Mahmoud AD, Lewis S, Juricic L, Udoh UA, Hartmann S, Jansen MA, Ogunbayo  
777 OA, Puggioni P, Holmes AP, Kumar P, Navarro-Dorado J, Foretz M, Viollet B, Dutia MB,  
778 Marshall I and Evans AM. AMP-activated Protein Kinase Deficiency Blocks the Hypoxic  
779 Ventilatory Response and Thus Precipitates Hypoventilation and Apnea. *Am J Respir Crit*  
780 *Care Med*. 2016;193:1032-43.
- 781 6. Mohr MA, Fairchild KD, Patel M, Sinkin RA, Clark MT, Moorman JR, Lake DE,  
782 Kattwinkel J and Delos JB. Quantification of periodic breathing in premature infants.  
783 *Physiol Meas*. 2015;36:1415-27.
- 784 7. Gauda EB, McLemore GL, Tolosa J, Marston-Nelson J and Kwak D. Maturation of  
785 peripheral arterial chemoreceptors in relation to neonatal apnoea. *Semin Neonatol*.  
786 2004;9:181-94.
- 787 8. O'Halloran KD. Chronic intermittent hypoxia creates the perfect storm with  
788 calamitous consequences for respiratory control. *Respir Physiol Neurobiol*. 2016;226:63-  
789 7.
- 790 9. Gozal D. The Energy Crisis Revisited: AMP-activated Protein Kinase and the  
791 Mammalian Hypoxic Ventilatory Response. *Am J Respir Crit Care Med*. 2016;193:945-6.
- 792 10. Boudeau J, Baas AF, Deak M, Morrice NA, Kieloch A, Schutkowski M, Prescott  
793 AR, Clevers HC and Alessi DR. MO25alpha/beta interact with STRADalpha/beta  
794 enhancing their ability to bind, activate and localize LKB1 in the cytoplasm. *EMBO J*.  
795 2003;22:5102-14.
- 796 11. Boudeau J, Scott JW, Resta N, Deak M, Kieloch A, Komander D, Hardie DG,  
797 Prescott AR, van Aalten DM and Alessi DR. Analysis of the LKB1-STRAD-MO25 complex.  
798 *J Cell Sci*. 2004;117:6365-75.
- 799 12. Hawley SA, Boudeau J, Reid JL, Mustard KJ, Udd L, Makela TP, Alessi DR and  
800 Hardie DG. Complexes between the LKB1 tumor suppressor, STRAD alpha/beta and  
801 MO25 alpha/beta are upstream kinases in the AMP-activated protein kinase cascade. *J*  
802 *Biol*. 2003;2:28.
- 803 13. Lizcano JM, Goransson O, Toth R, Deak M, Morrice NA, Boudeau J, Hawley SA,  
804 Udd L, Makela TP, Hardie DG and Alessi DR. LKB1 is a master kinase that activates 13  
805 kinases of the AMPK subfamily, including MARK/PAR-1. *EMBO J*. 2004;23:833-43.
- 806 14. Bright NJ, Thornton C and Carling D. The regulation and function of mammalian  
807 AMPK-related kinases. *Acta Physiol (Oxf)*. 2009;196:15-26.
- 808 15. Gowans GJ, Hawley SA, Ross FA and Hardie DG. AMP is a true physiological  
809 regulator of AMP-activated protein kinase by both allosteric activation and enhancing net  
810 phosphorylation. *Cell Metab*. 2013;18:556-66.
- 811 16. Buckler KJ and Turner PJ. Oxygen sensitivity of mitochondrial function in rat arterial  
812 chemoreceptor cells. *J Physiol*. 2013;591:3549-63.
- 813 17. Moreno-Dominguez A, Ortega-Saenz P, Gao L, Colinas O, Garcia-Flores P,  
814 Bonilla-Henao V, Aragonés J, Huttemann M, Grossman LI, Weissmann N, Sommer N and

- 815 Lopez-Barneo J. Acute O<sub>2</sub> sensing through HIF2 $\alpha$ -dependent expression of atypical  
816 cytochrome oxidase subunits in arterial chemoreceptors. *Sci Signal*. 2020;13:eaay9452.
- 817 18. Gonzalez A, Hall MN, Lin SC and Hardie DG. AMPK and TOR: The Yin and Yang  
818 of Cellular Nutrient Sensing and Growth Control. *Cell Metab*. 2020;31:472-492.
- 819 19. Woods A, Dickerson K, Heath R, Hong SP, Momcilovic M, Johnstone SR, Carlson  
820 M and Carling D. Ca<sup>2+</sup>/calmodulin-dependent protein kinase kinase-beta acts upstream  
821 of AMP-activated protein kinase in mammalian cells. *Cell Metab*. 2005;2:21-33.
- 822 20. Pinkosky SL, Scott JW, Desjardins EM, Smith BK, Day EA, Ford RJ, Langendorf  
823 CG, Ling NXY, Nero TL, Loh K, Galic S, Hoque A, Smiles WJ, Ngoei KRW, Parker MW,  
824 Yan Y, Melcher K, Kemp BE, Oakhill JS and Steinberg GR. Long-chain fatty acyl-CoA  
825 esters regulate metabolism via allosteric control of AMPK beta1 isoforms. *Nat Metab*.  
826 2020;2:873-881.
- 827 21. Zhang CS, Hawley SA, Zong Y, Li M, Wang Z, Gray A, Ma T, Cui J, Feng JW, Zhu  
828 M, Wu YQ, Li TY, Ye Z, Lin SY, Yin H, Piao HL, Hardie DG and Lin SC. Fructose-1,6-  
829 bisphosphate and aldolase mediate glucose sensing by AMPK. *Nature*. 2017;548:112-  
830 116.
- 831 22. Anderson KA, Ribar TJ, Lin F, Noeldner PK, Green MF, Muehlbauer MJ, Witters  
832 LA, Kemp BE and Means AR. Hypothalamic CaMKK2 contributes to the regulation of  
833 energy balance. *Cell Metab*. 2008;7:377-88.
- 834 23. Sakamoto K, McCarthy A, Smith D, Green KA, Grahame Hardie D, Ashworth A and  
835 Alessi DR. Deficiency of LKB1 in skeletal muscle prevents AMPK activation and glucose  
836 uptake during contraction. *EMBO J*. 2005;24:1810-20.
- 837 24. Sakamoto K, Zarrinpashneh E, Budas GR, Pouleur AC, Dutta A, Prescott AR,  
838 Vanoverschelde JL, Ashworth A, Jovanovic A, Alessi DR and Bertrand L. Deficiency of  
839 LKB1 in heart prevents ischemia-mediated activation of AMPK $\alpha$ 2 but not  
840 AMPK $\alpha$ 1. *Am J Physiol Endocrinol Metab*. 2006;290:E780-8.
- 841 25. Terziyski K and Draganova A. Central Sleep Apnea with Cheyne-Stokes Breathing  
842 in Heart Failure - From Research to Clinical Practice and Beyond. *Adv Exp Med Biol*.  
843 2018;1067:327-351.
- 844 26. Tatsumi K, Hannhart B, Pickett CK, Weil JV and Moore LG. Effects of testosterone  
845 on hypoxic ventilatory and carotid body neural responsiveness. *Am J Respir Crit Care*  
846 *Med*. 1994;149:1248-53.
- 847 27. Dasso LL, Buckler KJ and Vaughan-Jones RD. Interactions between hypoxia and  
848 hypercapnic acidosis on calcium signaling in carotid body type I cells. *Am J Physiol Lung*  
849 *Cell Mol Physiol*. 2000;279:L36-42.
- 850 28. Turner PJ and Buckler KJ. Oxygen and mitochondrial inhibitors modulate both  
851 monomeric and heteromeric TASK-1 and TASK-3 channels in mouse carotid body type-1  
852 cells. *The Journal of physiology*. 2013.
- 853 29. Fernandez-Aguera MC, Gao L, Gonzalez-Rodriguez P, Pintado CO, Arias-  
854 Mayenco I, Garcia-Flores P, Garcia-Perganeda A, Pascual A, Ortega-Saenz P and Lopez-  
855 Barneo J. Oxygen Sensing by Arterial Chemoreceptors Depends on Mitochondrial  
856 Complex I Signaling. *Cell Metab*. 2015;22:825-37.
- 857 30. Mulligan E and Lahiri S. Separation of carotid body chemoreceptor responses to  
858 O<sub>2</sub> and CO<sub>2</sub> by oligomycin and by antimycin A. *Am J Physiol*. 1982;242:C200-6.
- 859 31. Day TA and Wilson RJ. Brainstem PCO<sub>2</sub> modulates phrenic responses to specific  
860 carotid body hypoxia in an in situ dual perfused rat preparation. *J Physiol*. 2007;578:843-  
861 57.

- 862 32. Wilson RJ and Teppema LJ. Integration of Central and Peripheral Respiratory  
863 Chemoreflexes. *Compr Physiol*. 2016;6:1005-41.
- 864 33. Hodson EJ, Nicholls LG, Turner PJ, Llyr R, Fielding JW, Douglas G, Ratnayaka I,  
865 Robbins PA, Pugh CW, Buckler KJ, Ratcliffe PJ and Bishop T. Regulation of ventilatory  
866 sensitivity and carotid body proliferation in hypoxia by the PHD2/HIF-2 pathway. *J Physiol*.  
867 2016;594:1179-95.
- 868 34. Li P, Janczewski WA, Yackle K, Kam K, Pagliardini S, Krasnow MA and Feldman  
869 JL. The peptidergic control circuit for sighing. *Nature*. 2016;530:293-7.
- 870 35. Smith CA, Engwall MJ, Dempsey JA and Bisgard GE. Effects of specific carotid  
871 body and brain hypoxia on respiratory muscle control in the awake goat. *J Physiol*.  
872 1993;460:623-40.
- 873 36. Varas R, Wyatt CN and Buckler KJ. Modulation of TASK-like background  
874 potassium channels in rat arterial chemoreceptor cells by intracellular ATP and other  
875 nucleotides. *J Physiol*. 2007;583:521-36.
- 876 37. Ortega-Saenz P and Lopez-Barneo J. Physiology of the Carotid Body: From  
877 Molecules to Disease. *Annu Rev Physiol*. 2020;82:127-149.
- 878 38. Sacramento JF, Olea E, Ribeiro MJ, Prieto-Lloret J, Melo BF, Gonzalez C, Martins  
879 FO, Monteiro EC and Conde SV. Contribution of adenosine and ATP to the carotid body  
880 chemosensory activity in ageing. *J Physiol*. 2019;597:4991-5008.
- 881 39. Murali S and Nurse CA. Purinergic signalling mediates bidirectional crosstalk  
882 between chemoreceptor type I and glial-like type II cells of the rat carotid body. *J Physiol*.  
883 2016;594:391-406.
- 884 40. Jessen N, Koh HJ, Folmes CD, Wagg C, Fujii N, Lofgren B, Wolf CM, Berul CI,  
885 Hirshman MF, Lopaschuk GD and Goodyear LJ. Ablation of LKB1 in the heart leads to  
886 energy deprivation and impaired cardiac function. *Biochim Biophys Acta*. 2010;1802:593-  
887 600.
- 888 41. Fu A, Robitaille K, Faubert B, Reeks C, Dai XQ, Hardy AB, Sankar KS, Ogrel S,  
889 Al-Dirbashi OY, Rocheleau JV, Wheeler MB, MacDonald PE, Jones R and Screatton RA.  
890 LKB1 couples glucose metabolism to insulin secretion in mice. *Diabetologia*.  
891 2015;58:1513-22.
- 892 42. Swisa A, Granot Z, Tamarina N, Sayers S, Bardeesy N, Philipson L, Hodson DJ,  
893 Wikstrom JD, Rutter GA, Leibowitz G, Glaser B and Dor Y. Loss of Liver Kinase B1 (LKB1)  
894 in Beta Cells Enhances Glucose-stimulated Insulin Secretion Despite Profound  
895 Mitochondrial Defects. *J Biol Chem*. 2015;290:20934-20946.
- 896 43. He N, Fan W, Henriquez B, Yu RT, Atkins AR, Liddle C, Zheng Y, Downes M and  
897 Evans RM. Metabolic control of regulatory T cell (Treg) survival and function by Lkb1.  
898 *Proc Natl Acad Sci U S A*. 2017;114:12542-12547.
- 899 44. Conde SV, Monteiro EC, Rigual R, Obeso A and Gonzalez C. Hypoxic intensity: a  
900 determinant for the contribution of ATP and adenosine to the genesis of carotid body  
901 chemosensory activity. *J Appl Physiol (1985)*. 2012;112:2002-10.
- 902 45. Kim D, Cavanaugh EJ, Kim I and Carroll JL. Heteromeric TASK-1/TASK-3 is the  
903 major oxygen-sensitive background K<sup>+</sup> channel in rat carotid body glomus cells. *J Physiol*.  
904 2009;587:2963-75.
- 905 46. Pepper DR, Landauer RC and Kumar P. Postnatal development of CO<sub>2</sub>-O<sub>2</sub>  
906 interaction in the rat carotid body in vitro. *J Physiol*. 1995;485 ( Pt 2):531-41.
- 907 47. Koh HJ, Arnolds DE, Fujii N, Tran TT, Rogers MJ, Jessen N, Li Y, Liew CW, Ho  
908 RC, Hirshman MF, Kulkarni RN, Kahn CR and Goodyear LJ. Skeletal muscle-selective

- 909 knockout of LKB1 increases insulin sensitivity, improves glucose homeostasis, and  
910 decreases TRB3. *Molecular and cellular biology*. 2006;26:8217-27.
- 911 48. Shaw RJ, Lamia KA, Vasquez D, Koo SH, Bardeesy N, Depinho RA, Montminy M  
912 and Cantley LC. The kinase LKB1 mediates glucose homeostasis in liver and therapeutic  
913 effects of metformin. *Science*. 2005;310:1642-6.
- 914 49. Gan B, Hu J, Jiang S, Liu Y, Sahin E, Zhuang L, Fletcher-Sananikone E, Colla S,  
915 Wang YA, Chin L and Depinho RA. Lkb1 regulates quiescence and metabolic  
916 homeostasis of haematopoietic stem cells. *Nature*. 2010;468:701-4.
- 917 50. Gurumurthy S, Xie SZ, Alagesan B, Kim J, Yusuf RZ, Saez B, Tzatsos A, Ozsolak  
918 F, Milos P, Ferrari F, Park PJ, Shirihai OS, Scadden DT and Bardeesy N. The Lkb1  
919 metabolic sensor maintains haematopoietic stem cell survival. *Nature*. 2010;468:659-63.
- 920 51. Patel K, Foretz M, Marion A, Campbell DG, Gourlay R, Boudaba N, Tournier E,  
921 Titchenell P, Peggie M, Deak M, Wan M, Kaestner KH, Goransson O, Viollet B, Gray NS,  
922 Birnbaum MJ, Sutherland C and Sakamoto K. The LKB1-salt-inducible kinase pathway  
923 functions as a key gluconeogenic suppressor in the liver. *Nat Commun*. 2014;5:4535.
- 924 52. Choi S, Lim DS and Chung J. Feeding and Fasting Signals Converge on the LKB1-  
925 SIK3 Pathway to Regulate Lipid Metabolism in Drosophila. *PLoS genetics*.  
926 2015;11:e1005263.
- 927 53. Evans AM. AMP-activated protein kinase and the regulation of Ca<sup>2+</sup> signalling in  
928 O<sub>2</sub>-sensing cells. *J Physiol*. 2006;574:113-23.
- 929 54. Curran AK, Rodman JR, Eastwood PR, Henderson KS, Dempsey JA and Smith  
930 CA. Ventilatory responses to specific CNS hypoxia in sleeping dogs. *J Appl Physiol*  
931 (1985). 2000;88:1840-52.
- 932 55. Smith CA, Forster HV, Blain GM and Dempsey JA. An interdependent model of  
933 central/peripheral chemoreception: evidence and implications for ventilatory control.  
934 *Respir Physiol Neurobiol*. 2010;173:288-97.
- 935 56. Blain GM, Smith CA, Henderson KS and Dempsey JA. Peripheral chemoreceptors  
936 determine the respiratory sensitivity of central chemoreceptors to CO<sub>2</sub>. *J Physiol*.  
937 2010;588:2455-71.
- 938 57. Ponikowski P, Chua TP, Anker SD, Francis DP, Doehner W, Banasiak W, Poole-  
939 Wilson PA, Piepoli MF and Coats AJ. Peripheral chemoreceptor hypersensitivity: an  
940 ominous sign in patients with chronic heart failure. *Circulation*. 2001;104:544-9.
- 941 58. Hall MJ, Xie A, Rutherford R, Ando S, Floras JS and Bradley TD. Cycle length of  
942 periodic breathing in patients with and without heart failure. *Am J Respir Crit Care Med*.  
943 1996;154:376-81.
- 944 59. Topor ZL, Vasilakos K, Younes M and Remmers JE. Model based analysis of sleep  
945 disordered breathing in congestive heart failure. *Respir Physiol Neurobiol*. 2007;155:82-  
946 92.
- 947 60. Ross FA, MacKintosh C and Hardie DG. AMP-activated protein kinase: a cellular  
948 energy sensor that comes in 12 flavours. *FEBS J*. 2016;283:2987-3001.
- 949 61. Bell HJ, Azubike E and Haouzi P. The "other" respiratory effect of opioids:  
950 suppression of spontaneous augmented ("sigh") breaths. *J Appl Physiol (1985)*.  
951 2011;111:1296-303.
- 952 62. Ikematsu N, Dallas ML, Ross FA, Lewis RW, Rafferty JN, David JA, Suman R,  
953 Peers C, Hardie DG and Evans AM. Phosphorylation of the voltage-gated potassium  
954 channel Kv2.1 by AMP-activated protein kinase regulates membrane excitability. *Proc*  
955 *Natl Acad Sci U S A*. 2011;108:18132-7.

- 956 63. Ross FA, Rafferty JN, Dallas ML, Ogunbayo O, Ikematsu N, McClafferty H, Tian L,  
957 Widmer H, Rowe IC, Wyatt CN, Shipston MJ, Peers C, Hardie DG and Evans AM.  
958 Selective Expression in Carotid Body Type I Cells of a Single Splice Variant of the Large  
959 Conductance Calcium- and Voltage-activated Potassium Channel Confers Regulation by  
960 AMP-activated Protein Kinase. *J Biol Chem*. 2011;286:11929-36.
- 961 64. Lipton AJ, Johnson MA, Macdonald T, Lieberman MW, Gozal D and Gaston B. S-  
962 nitrosothiols signal the ventilatory response to hypoxia. *Nature*. 2001;413:171-4.
- 963 65. Murphy BA, Fakira KA, Song Z, Beuve A and Routh VH. AMP-activated protein  
964 kinase and nitric oxide regulate the glucose sensitivity of ventromedial hypothalamic  
965 glucose-inhibited neurons. *Am J Physiol Cell Physiol*. 2009;297:C750-8.
- 966 66. Chau EH, Lam D, Wong J, Mokhlesi B and Chung F. Obesity hypoventilation  
967 syndrome: a review of epidemiology, pathophysiology, and perioperative considerations.  
968 *Anesthesiology*. 2012;117:188-205.
- 969 67. Ainslie PN, Lucas SJ and Burgess KR. Breathing and sleep at high altitude. *Respir*  
970 *Physiol Neurobiol*. 2013;188:233-56.
- 971 68. Eichenwald EC, Committee on F and Newborn AAoP. Apnea of Prematurity.  
972 *Pediatrics*. 2016;137.
- 973 69. Lantier L, Fentz J, Mounier R, Leclerc J, Treebak JT, Pehmoller C, Sanz N,  
974 Sakakibara I, Saint-Amand E, Rimbaud S, Maire P, Marette A, Ventura-Clapier R, Ferry  
975 A, Wojtaszewski JF, Foretz M and Viollet B. AMPK controls exercise endurance,  
976 mitochondrial oxidative capacity, and skeletal muscle integrity. *FASEB J*. 2014;28:3211-  
977 24.
- 978 70. Nurse CA. Synaptic and paracrine mechanisms at carotid body arterial  
979 chemoreceptors. *J Physiol*. 2014;592:3419-26.
- 980 71. Hirooka Y, Polson JW, Potts PD and Dampney RA. Hypoxia-induced Fos  
981 expression in neurons projecting to the pressor region in the rostral ventrolateral medulla.  
982 *Neuroscience*. 1997;80:1209-24.
- 983 72. Lindeberg J, Usoskin D, Bengtsson H, Gustafsson A, Kylberg A, Soderstrom S and  
984 Ebendal T. Transgenic expression of Cre recombinase from the tyrosine hydroxylase  
985 locus. *Genesis*. 2004;40:67-73.
- 986 73. Holmes AP, Turner PJ, Buckler KJ and Kumar P. Moderate inhibition of  
987 mitochondrial function augments carotid body hypoxic sensitivity. *Pflugers Arch*.  
988 2016;468:143-55.
- 989 74. Vidruk EH, Olson EB, Jr., Ling L and Mitchell GS. Responses of single-unit carotid  
990 body chemoreceptors in adult rats. *J Physiol*. 2001;531:165-70.
- 991 75. Holmes AP, Nunes AR, Cann MJ and Kumar P. Ecto-5'-Nucleotidase, Adenosine  
992 and Transmembrane Adenylyl Cyclase Signalling Regulate Basal Carotid Body  
993 Chemoafferent Outflow and Establish the Sensitivity to Hypercapnia. *Adv Exp Med Biol*.  
994 2015;860:279-89.
- 995

996 **Figure 1. Conditional deletion of *Lkb1* in carotid body type I cells blocks**  
997 **hypoxia-evoked calcium transients**  
998 a, Confocal image shows tdTomato (excitation 555 nm, emission 582 nm) positive type I  
999 cells in-situ within a section of tissue comprising the carotid body, superior cervical  
1000 ganglion (SCG) and carotid artery; note endothelial cells and sympathetic neurons  
1001 express tyrosine hydroxylase (TH). b, Acutely isolated carotid body type I cells stained for  
1002 TH and DAPI. c, Single cell end-point RT-PCR amplicons for TH and *Lkb1* from acutely  
1003 isolated adrenal medullary chromaffin cells (WT AMCs) and carotid body type I cells of  
1004 wild type (WT CB1 cells) and conditional *Lkb1* knockout mice (*Lkb1* hom KO CB1 cells);  
1005 NC = negative control (cell aspirant but no reverse transcriptase added); NEC = negative  
1006 extracellular control (aspirant of extracellular medium). d, Exemplar records show calcium  
1007 transients evoked by 50 mM potassium and hypoxia (mean±SEM  $PO_2$  =  
1008  $20.19 \pm 1.73$  mmHg, ~2%  $O_2$ ; n = 10) in type I cells isolated from (I) TH-Cre (black; n = 8  
1009 different carotid body type I cells), (II) homozygous *Lkb1* homozygous floxed (*Lkb1* hom  
1010 Fx, blue; n = 11 different carotid body type I cells) and (III) conditional homozygous *Lkb1*  
1011 hom KO (red, n= 8 different carotid body type I cells) mice. e-g, Dot plots show mean±SEM  
1012 F340/F380 ratios for calcium transients evoked by (e) 50 mM potassium, (f) hypoxia, while  
1013 (g) shows the hypoxic response expressed as a ratio of the response to 50mM potassium.  
1014 \*=p<0.05, \*\*=p<0.01, \*\*\*\*=p<0.0001. Replicates taken from ≥3 different mice.  
1015

1016  
1017  
1018  
1019  
1020 **Figure 2. Conditional deletion of *Lkb1* in carotid body type I cells attenuates basal**  
1021 **and hypoxia-evoked afferent discharge from the carotid body in-vitro** a shows (I)  
1022 extracellular recordings of chemoafferent discharge versus time during normoxia and  
1023 hypoxia and (II) frequency-time histograms (*inset*: single fibre discriminations) for carotid  
1024 bodies from control (TH-Cre, black), *Lkb1* homozygous floxed (*Lkb1* hom Fx, blue, middle  
1025 panels), and conditional *Lkb1* homozygous knockout mice (*Lkb1* hom KO, red). b,  
1026 Exemplar frequency- $PO_2$  response curves for records shown in (a). c, Compares  
1027 mean $\pm$ SEM for frequency- $PO_2$  response curves for TH-Cre (n = 8 different carotid bodies),  
1028 homozygous *Lkb1* floxed (n = 8 different carotid bodies) and conditional homozygous  
1029 *Lkb1* knockout (n = 7 different carotid bodies) mice. Dot plots show mean $\pm$ SEM for (d)  
1030 basal single fibre discharge frequency and (e) peak single fibre discharge frequency  
1031 during hypoxia. \* =p<0.05, \*\* =p<0.01, \*\*\*\*=p< 0.0001.



1032  
1033 **Figure 3. Conditional deletion of *Lkb1* in carotid body type I cells attenuates basal**  
1034 **and hypercapnia-evoked afferent discharge from the carotid body in-vitro**  
1035 a, shows (I) extracellular recordings of chemoafferent discharge versus time during  
1036 normoxia/normocapnia and hypercapnia and (II) frequency-time histograms for carotid  
1037 bodies from control (TH-Cre, black; n = 7 different carotid bodies), homozygous *Lkb1*  
1038 floxed (*Lkb1* hom Fx, blue; n = 6 different carotid bodies) and conditional *Lkb1*  
1039 homozygous knockout (*Lkb1* hom KO, red; n = 4 different carotid bodies) mice (*inset*:  
1040 single fibre discriminations). b shows mean±SEM for chemoafferent discharge versus  
1041 *PCO*<sub>2</sub>. c, Dot plots show mean±SEM for CO<sub>2</sub> sensitivity for TH-Cre (black), *Lkb1* hom Fx  
1042 (blue) and *Lkb1* hom KO (blue). \*\*=p< 0.01.  
1043

1044  
1045 **Figure 4. Conditional deletion of *AMPK- $\alpha$ 1+ $\alpha$ 2* in carotid body type I cells has no**  
1046 **effect on hypoxia-evoked or hypercapnia-evoked afferent discharge from the**  
1047 **carotid body in-vitro**  
1048 a, Shows (I) extracellular recordings of chemoafferent discharge versus time during  
1049 normoxia and hypoxia and (II) frequency-time histograms (*inset*: single fibre  
1050 discriminations) for carotid bodies from controls (TH-Cre, black; n = 8 different carotid  
1051 bodies), *AMPK $\alpha$ 1+ $\alpha$ 2* homozygous floxed (*AMPK $\alpha$ 1+ $\alpha$ 2* hom Fx, beige; n = 9 different  
1052 carotid bodies) and conditional homozygous *AMPK $\alpha$ 1+ $\alpha$ 2* knockout mice (*AMPK $\alpha$ 1+ $\alpha$ 2*  
1053 hom KO, purple; n = 9 different carotid bodies). b, Means $\pm$ SEM for frequency-*PO*<sub>2</sub>  
1054 response curves for homozygous *AMPK $\alpha$ 1+ $\alpha$ 2* hom Fx and *AMPK $\alpha$ 1+ $\alpha$ 2* hom KO. c-d,  
1055 Dot plots show mean $\pm$ SEM for (c) basal single fibre discharge frequency and (d) peak  
1056 single fibre discharge frequency during hypoxia. e, as for (a) but in response to  
1057 hypercapnia. f, Means $\pm$ SEM for frequency-*PCO*<sub>2</sub> relationship. g, Dot plot shows  
1058 mean $\pm$ SEM for CO<sub>2</sub> sensitivity.  
1059  
1060

1061  
1062  
1063 **Figure 5 - Mice hypomorphic for LKB1 exhibit an attenuated hypoxic ventilatory**  
1064 **response measured by unrestrained plethysmography.**  
1065 a, Example records of minute ventilation versus time. b, Dot plots of mean±SEM for %  
1066 change in minute ventilation at the peak of the Augmenting Phase (AP, ~30s), after Roll  
1067 Off (RO, ~100s) and during the plateau of the Sustained Phase (SP, ~300s) of the  
1068 ventilatory response to 12% and 8% O<sub>2</sub> for TH-Cre (black; 12% O<sub>2</sub>, n = 25 independent  
1069 experiments; 8% O<sub>2</sub>, n = 37 independent experiments), *Lkb1* homozygous floxed (*Lkb1*  
1070 hom Fx, blue; 12% O<sub>2</sub>, n = 14 independent experiments; 8% O<sub>2</sub>, n = 15 independent  
1071 experiments) and conditional *Lkb1* homozygous knockout mice (*Lkb1* hom KO, red; n =  
1072 22 independent experiments; 8% O<sub>2</sub>, n = 30 independent experiments). \*\*=p<0.01;  
1073 \*\*\*\*=p<0.0001.  
1074

1075  
1076  
1077  
1078  
1079 **Figure 6. Conditional deletion of *Lkb1* and AMPK in tyrosine hydroxylase**  
1080 **expressing cells attenuates increases in breathing frequency during hypoxia but**  
1081 **only *Lkb1* deletion augments increases in tidal volume during severe hypoxia.**  
1082 Dot plots of mean±SEM for changes in (a) breathing frequency and (b) tidal volume at the  
1083 peak of the Augmenting Phase (~30s), at ~100s following Roll Off and during the plateau  
1084 of the Sustained Phase (~300s) of the ventilatory response to mild (12% O<sub>2</sub>) and severe  
1085 (8% O<sub>2</sub>) hypoxia for TH-Cre (black; 12% O<sub>2</sub>, n = 25 independent experiments; 8% O<sub>2</sub>, n =  
1086 37 independent experiments), *Lkb1* homozygous floxed (*Lkb1* hom Fx, blue; 12% O<sub>2</sub>, n =  
1087 14 independent experiments; 8% O<sub>2</sub>, n = 15 independent experiments) that are ~90%  
1088 hypomorphic for LKB1 and conditional *Lkb1* homozygous knockout mice (*Lkb1* hom KO,  
1089 red; 12% O<sub>2</sub>, n = 22 independent experiments; 8% O<sub>2</sub>, n = 30 independent experiments).  
1090 These data are also compared with outcomes for *AMPKα1+α2* homozygous floxed mice  
1091 (*AMPKα1+α2* hom Fx, beige, 12% O<sub>2</sub> n = 30 independent experiments; 8% O<sub>2</sub>, n = 13  
1092 independent experiments) and conditional *AMPKα1+α2* homozygous knockout mice  
1093 (*AMPKα1+α2* hom KO, purple, 12% O<sub>2</sub> n = 30 independent experiments; 8% O<sub>2</sub>, n = 26  
1094 independent experiments). \*= $p<0.05$ , \*\*= $p<0.01$ , \*\*\*\*= $p<0.0001$  compared to TH-Cre.  
1095

1096  
1097  
1098  
1099  
1100  
1101  
1102 **Figure 7. Conditional deletion of *Lkb1* in tyrosine hydroxylase expressing cells precipitates hypoventilation, apnoea and Cheyne-Stokes-like breathing during severe hypoxia.**  
1103  
1104  
1105 a, Example records of ventilatory activity from TH-Cre and conditional *Lkb1* homozygous  
1106 knockout mice (*Lkb1* hom KO) during (I) normoxia (21% O<sub>2</sub>), (II) hypoxia (8% O<sub>2</sub>) and (III)  
1107 hypoxia with hypercapnia (8% O<sub>2</sub> + 5% CO<sub>2</sub>), that were obtained using whole body  
1108 plethysmography. b(I-II), Typical ventilatory records for TH-Cre and conditional *Lkb1* hom  
1109 KO mice on an expanded time scale at the indicated time points during exposures to  
1110 severe hypoxia (8% O<sub>2</sub>). Dot plots show mean±SEM for (c) apnoeic frequency, (d) apnoea  
1111 duration and (e) apnoea-duration index (frequency x duration) for TH-Cre (black; 12% O<sub>2</sub>,  
1112 n = 19 independent experiments; 8% O<sub>2</sub>, n = 24 independent experiments) and conditional  
1113 *Lkb1* hom KO mice (red; 12% O<sub>2</sub>, n = 17 independent experiments; 8% O<sub>2</sub>, n = 29  
1114 independent experiments) during exposures to 12% O<sub>2</sub>, 8% O<sub>2</sub> and 8% O<sub>2</sub> + 5% CO<sub>2</sub>.  
1115 \*=p<0.05, \*\*=p<0.01, \*\*\*\*=p< 0.0001.  
1116

1117  
1118  
1119  
1120 **Figure 8. Conditional deletion of *Lkb1* in tyrosine hydroxylase expressing cells**  
1121 **markedly slows the hypercapnic ventilatory response.**  
1122 Dot plots show mean±SEM for increases in minute ventilation at ~30s, 100s and 300s  
1123 during exposures to (a) hypercapnic hypoxia (5% CO<sub>2</sub> + 8%O<sub>2</sub>) and (b) hypercapnia (5%  
1124 CO<sub>2</sub>) for TH-Cre (black; 8% O<sub>2</sub> + 5% CO<sub>2</sub> n = 17 independent experiments; 5% CO<sub>2</sub>, n =  
1125 20 independent experiments), conditional *Lkb1* homozygous knockout mice (*Lkb1* hom  
1126 KO, red; 8% O<sub>2</sub> + 5% CO<sub>2</sub>, n = 15 independent experiments; 5% CO<sub>2</sub>, n = 20 independent  
1127 experiments), *AMPKα1+α2* homozygous floxed mice (*AMPKα1+α2* hom Fx, beige; O<sub>2</sub> +  
1128 5% CO<sub>2</sub> n = 20 independent experiments; 5% CO<sub>2</sub>, n = 20 independent experiments) and  
1129 *AMPKα1+α2* homozygous knockout mice (*AMPKα1+α2* hom KO, purple, O<sub>2</sub> + 5% CO<sub>2</sub> n  
1130 = 22 independent experiments; 5% CO<sub>2</sub>, n = 23 independent experiments). \*= $p < 0.05$ ,  
1131 \*\*= $p < 0.01$ .  
1132

1133  
1134  
1135 **Figure 9. Graphical abstract showing the divergent pathways by which LKB1 and**  
1136 **AMPK may coordinate the hypoxic ventilatory response:** LKB1, liver kinase B1;  
1137 AMPK, AMP-activated protein kinase; ARK, AMPK-related kinase; NTS nucleus tractus  
1138 solitarius; VLM, ventrolateral medulla.

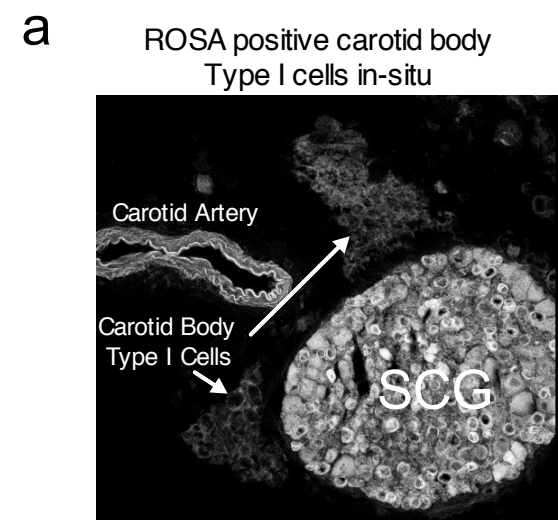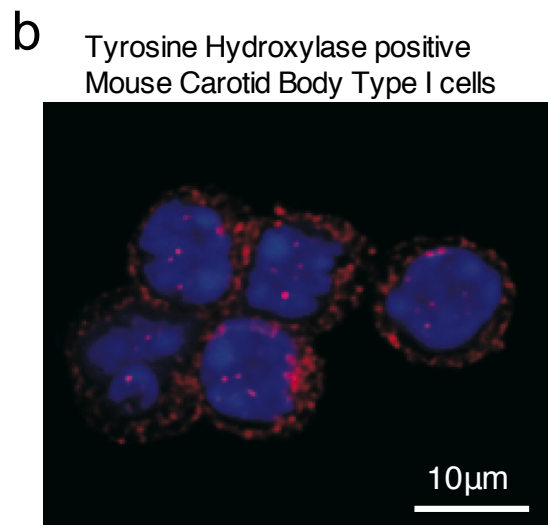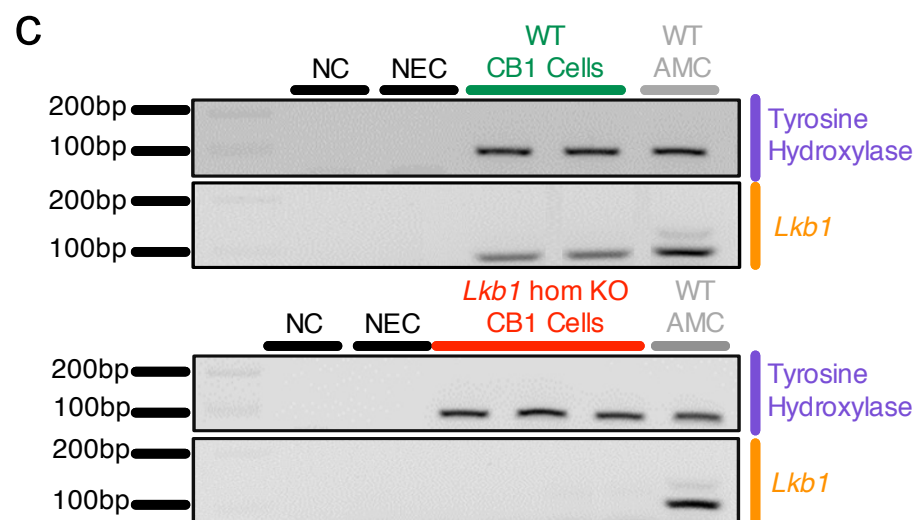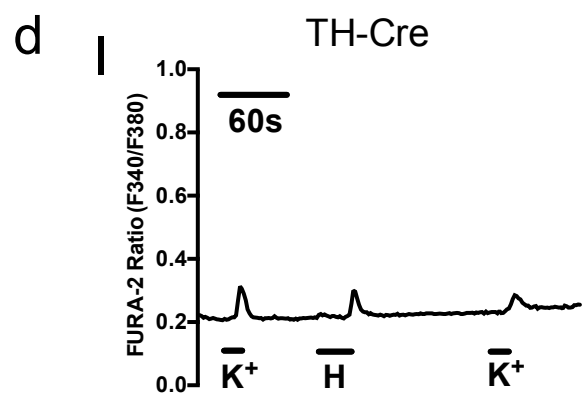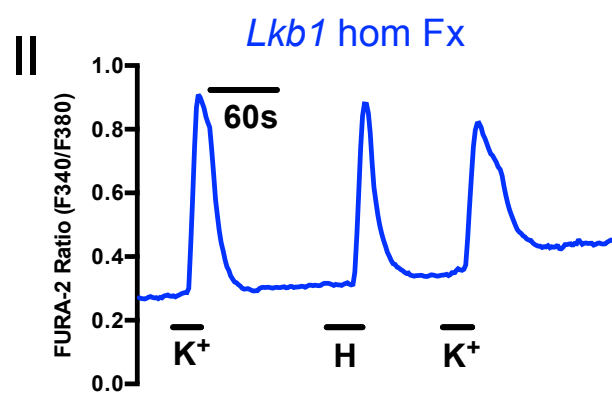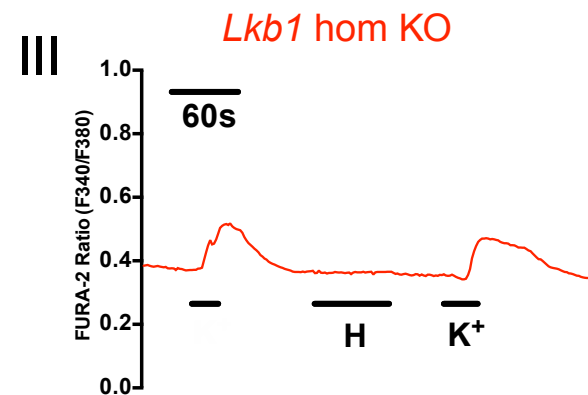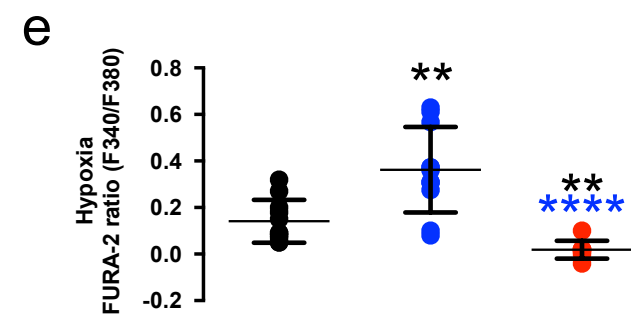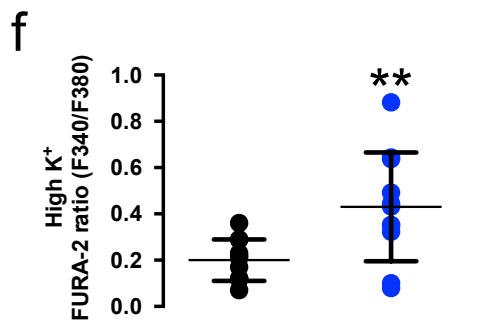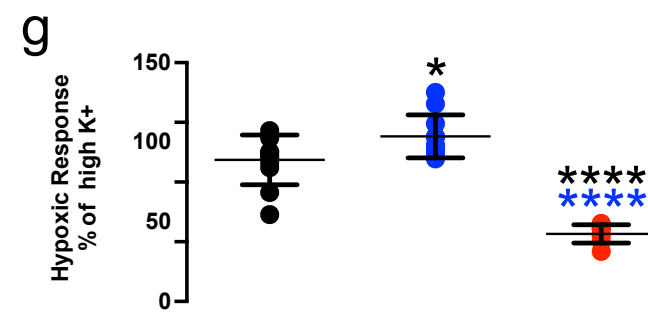



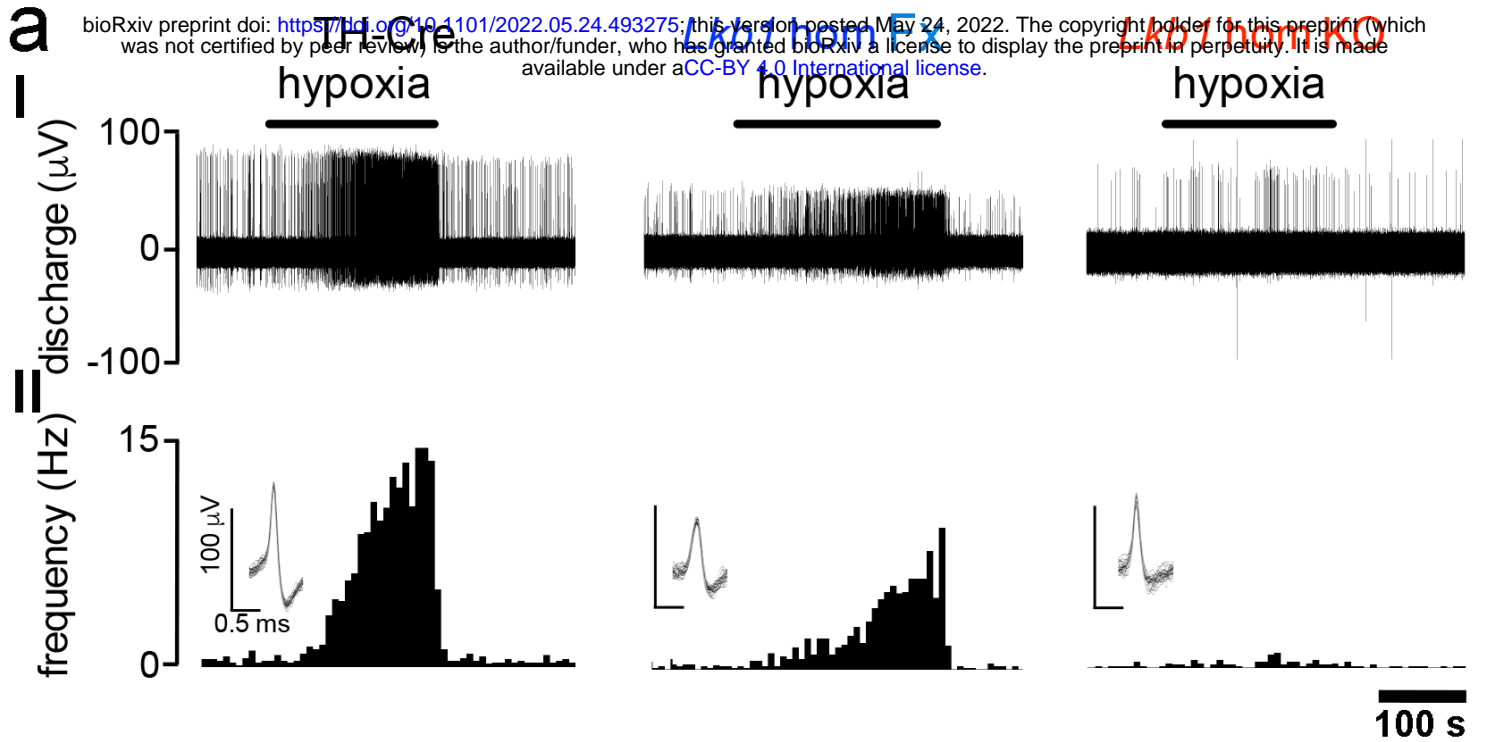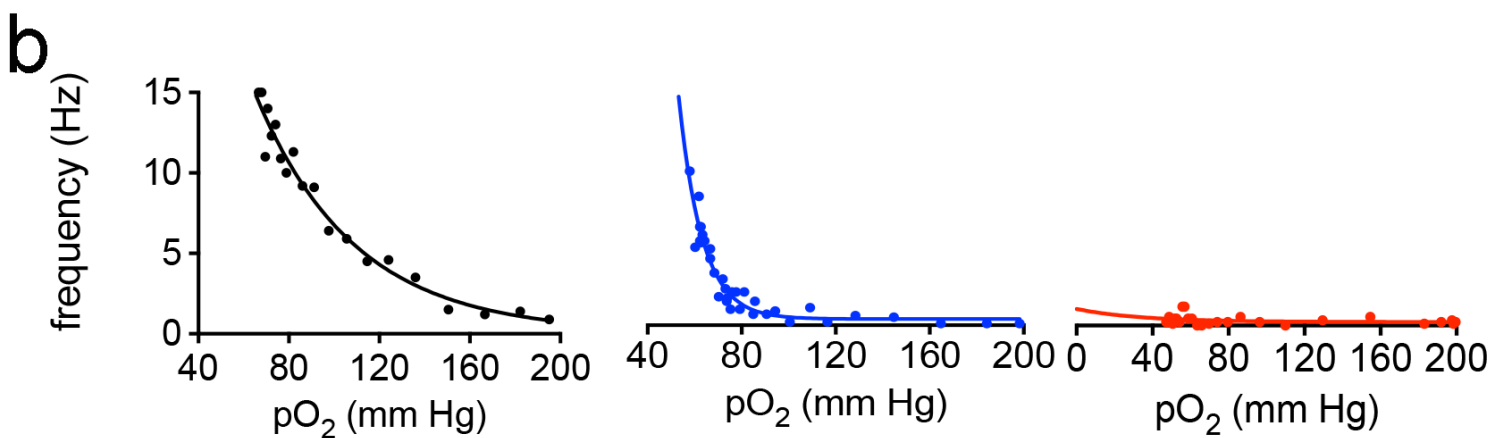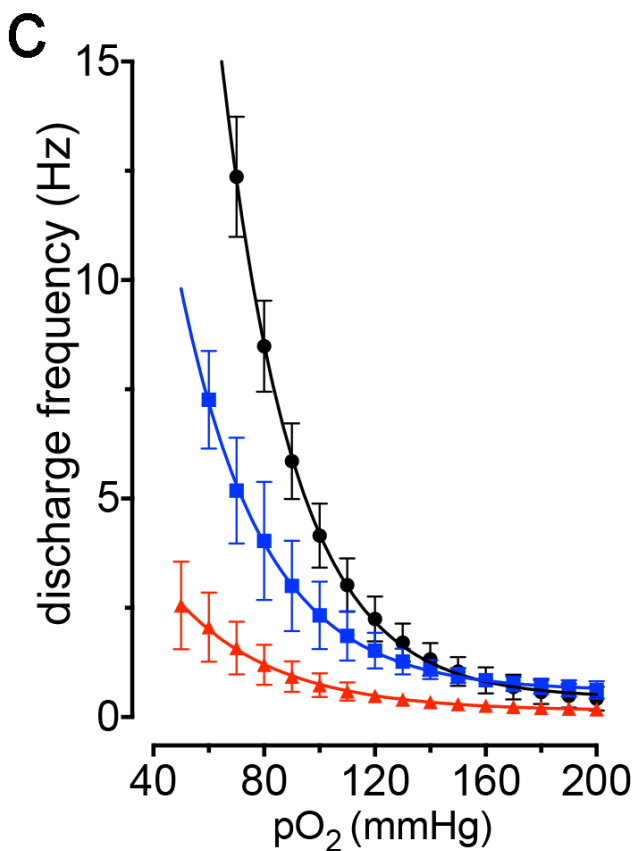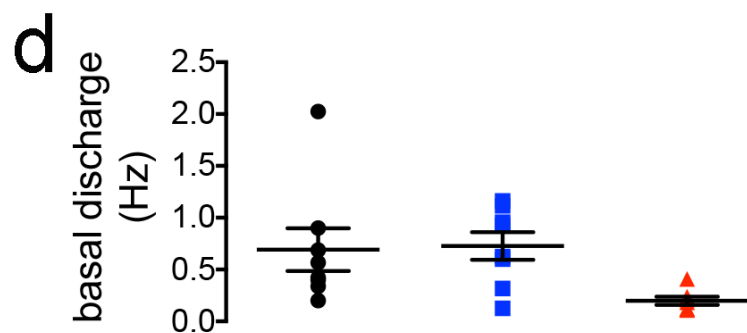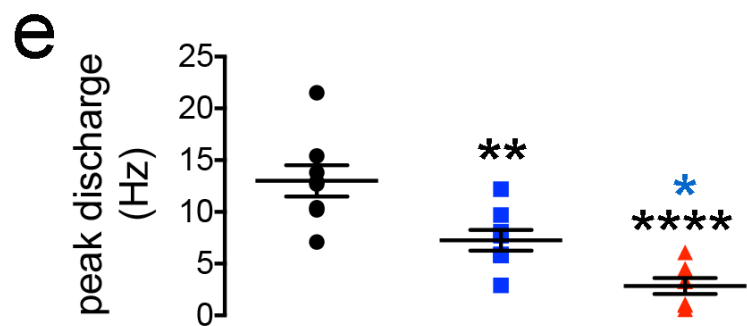

**a**

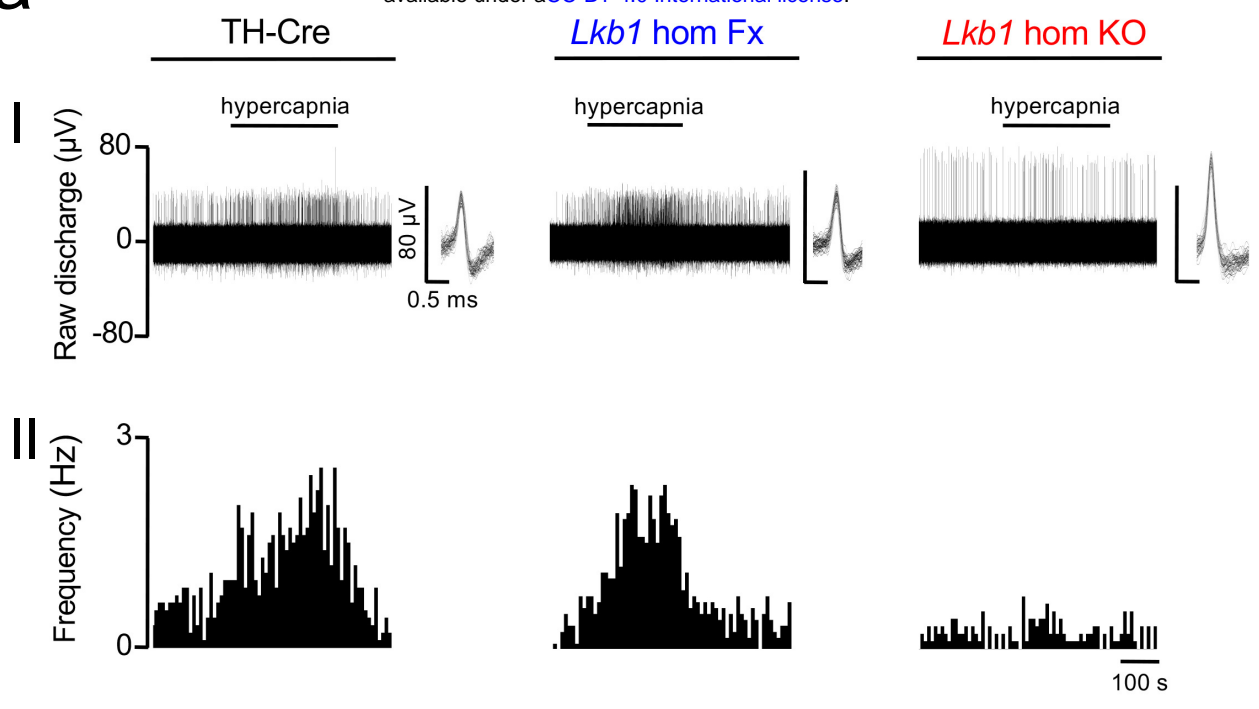

**b**

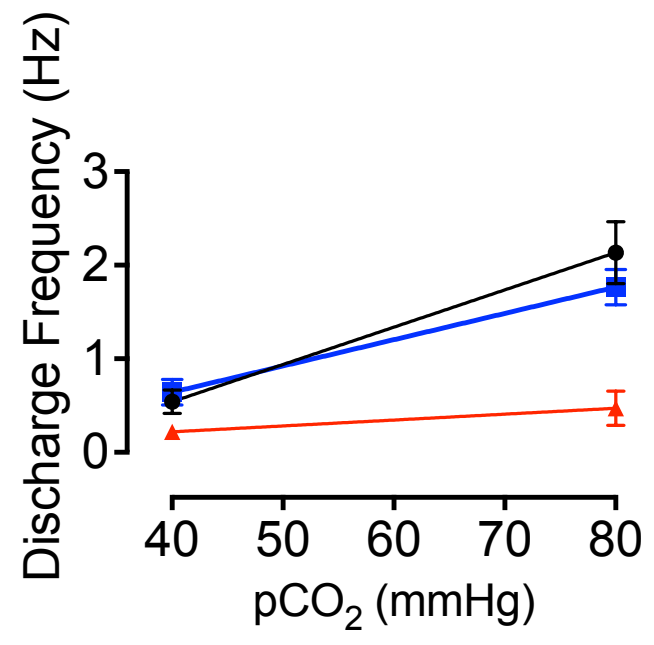

**c**

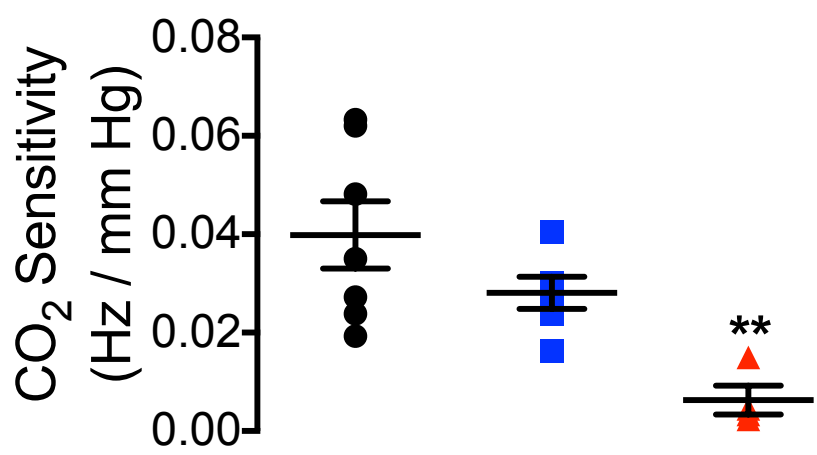

TH-Cre

*AMPK $\alpha$ 1+2 hom Fx**AMPK $\alpha$ 1+2 hom KO***a**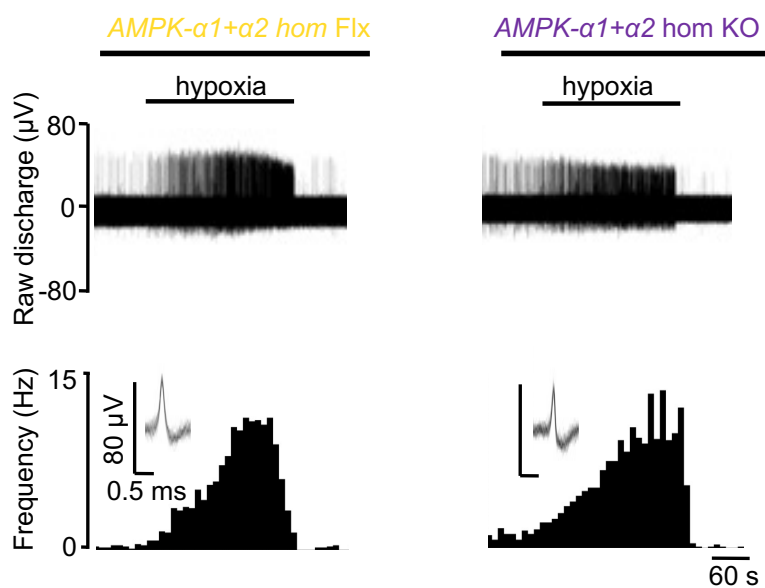**b**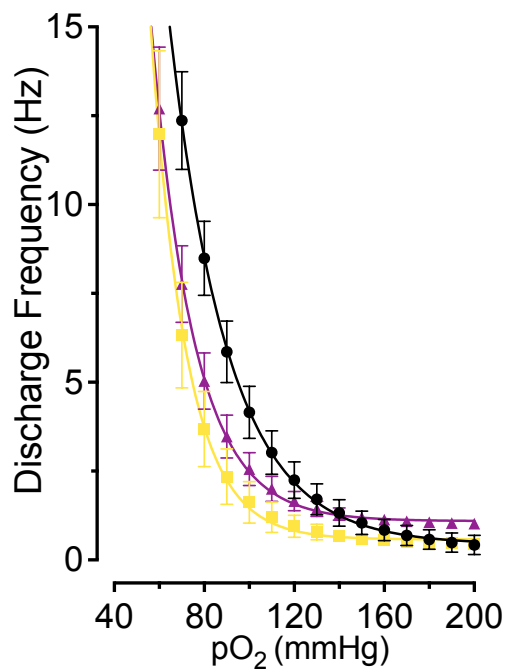**c**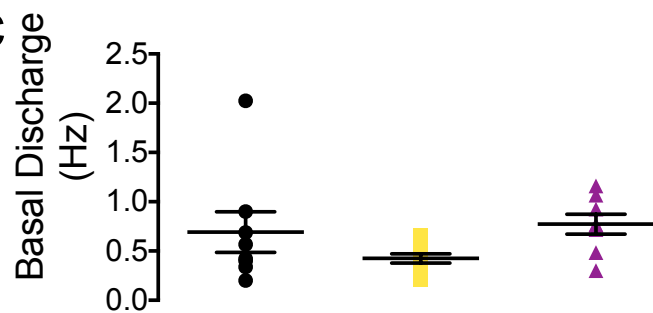**d**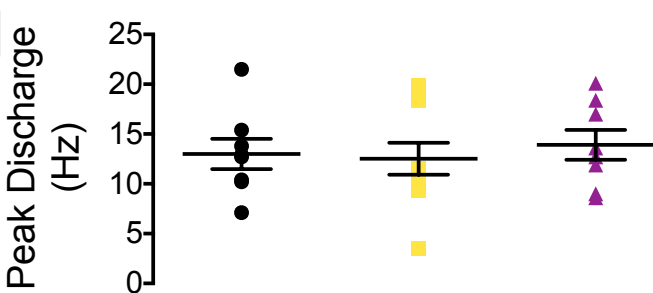**e**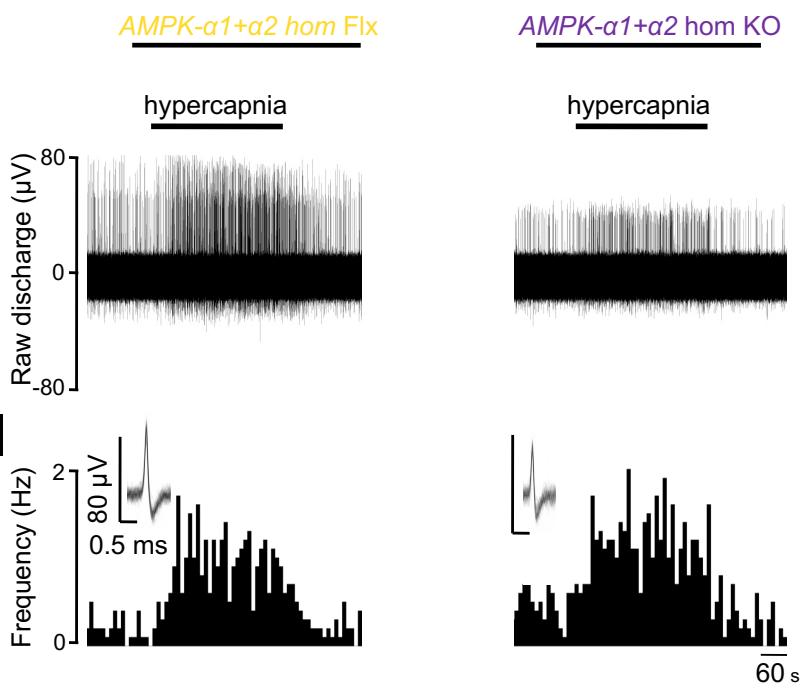**f**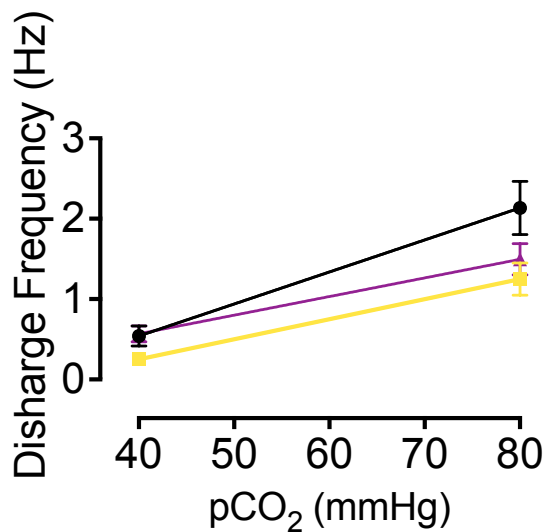**g**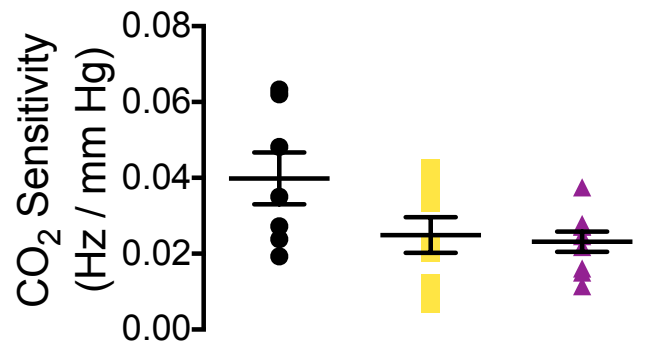

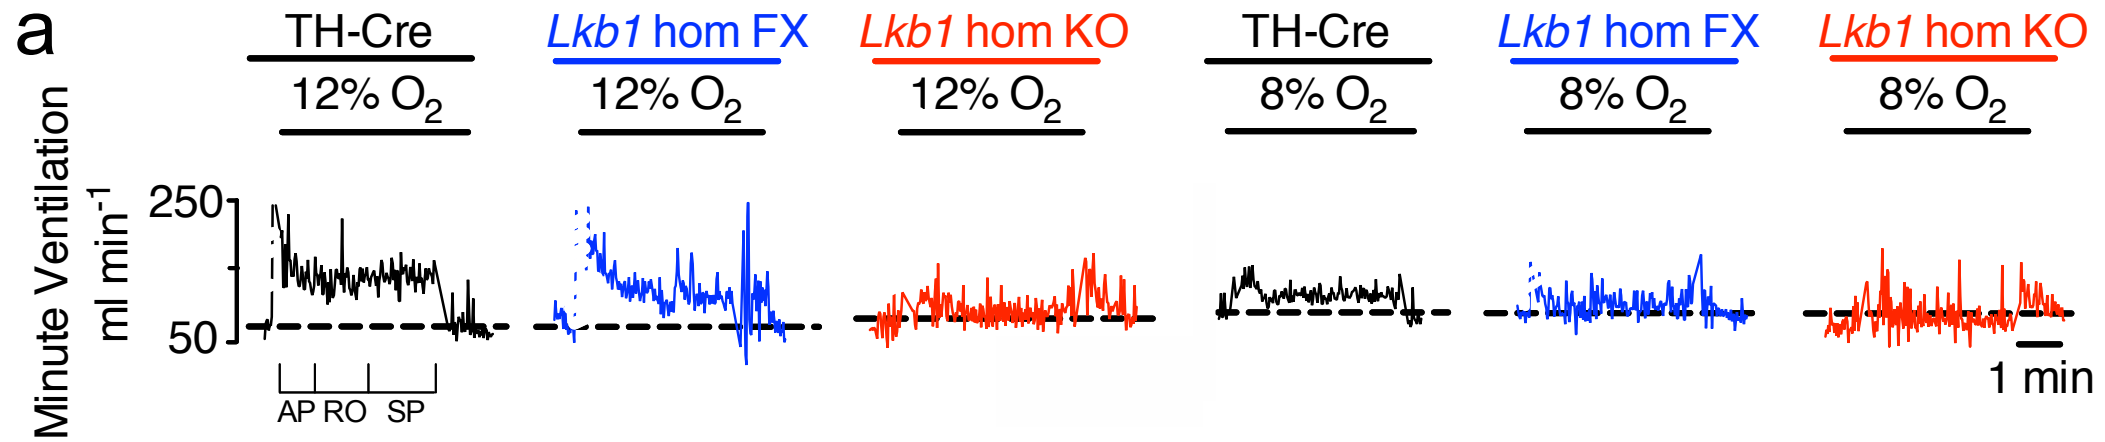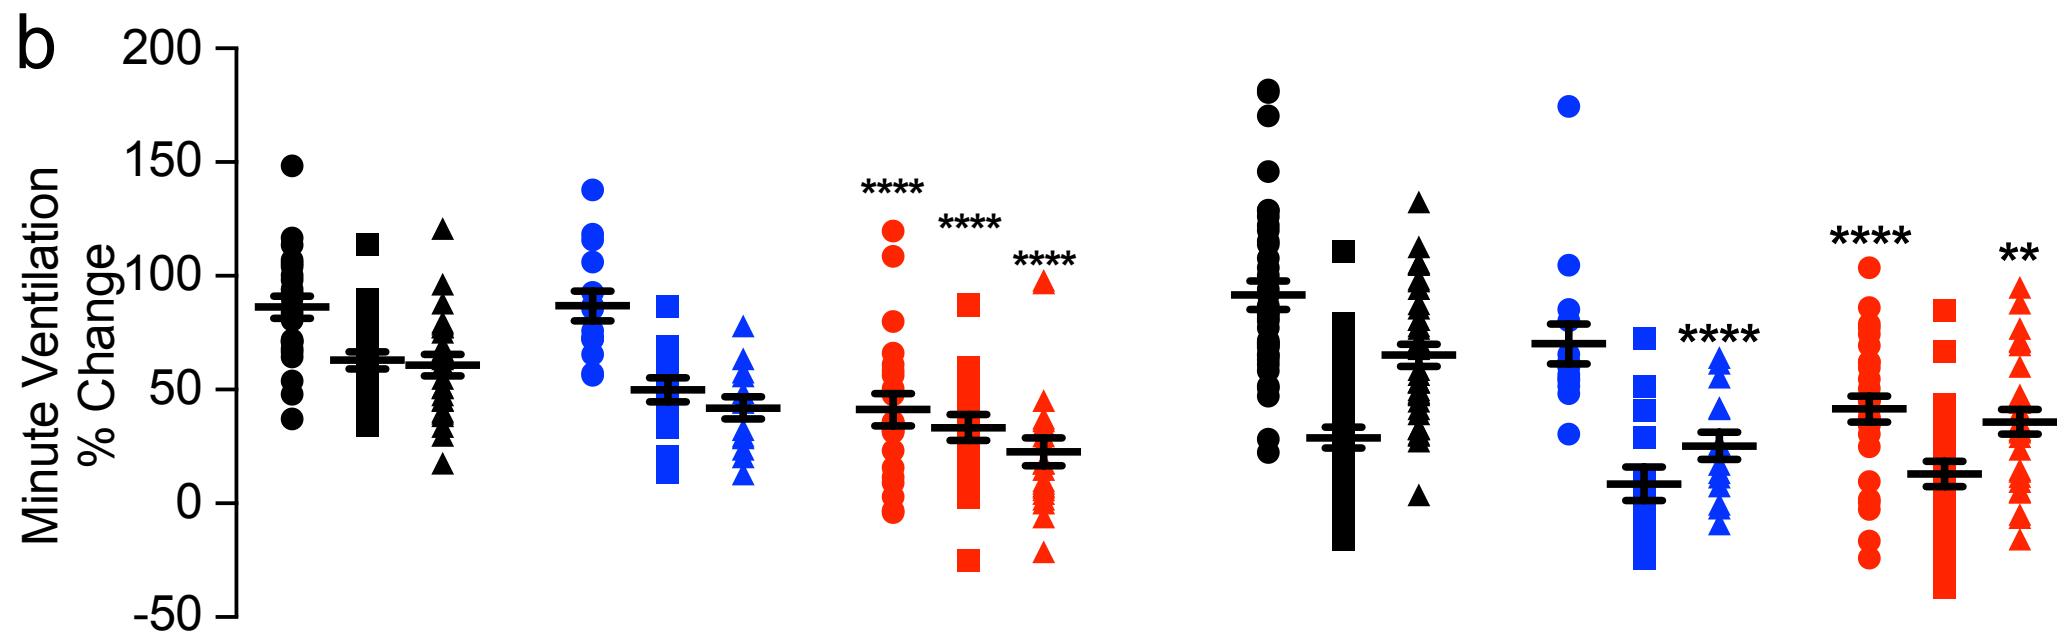

a

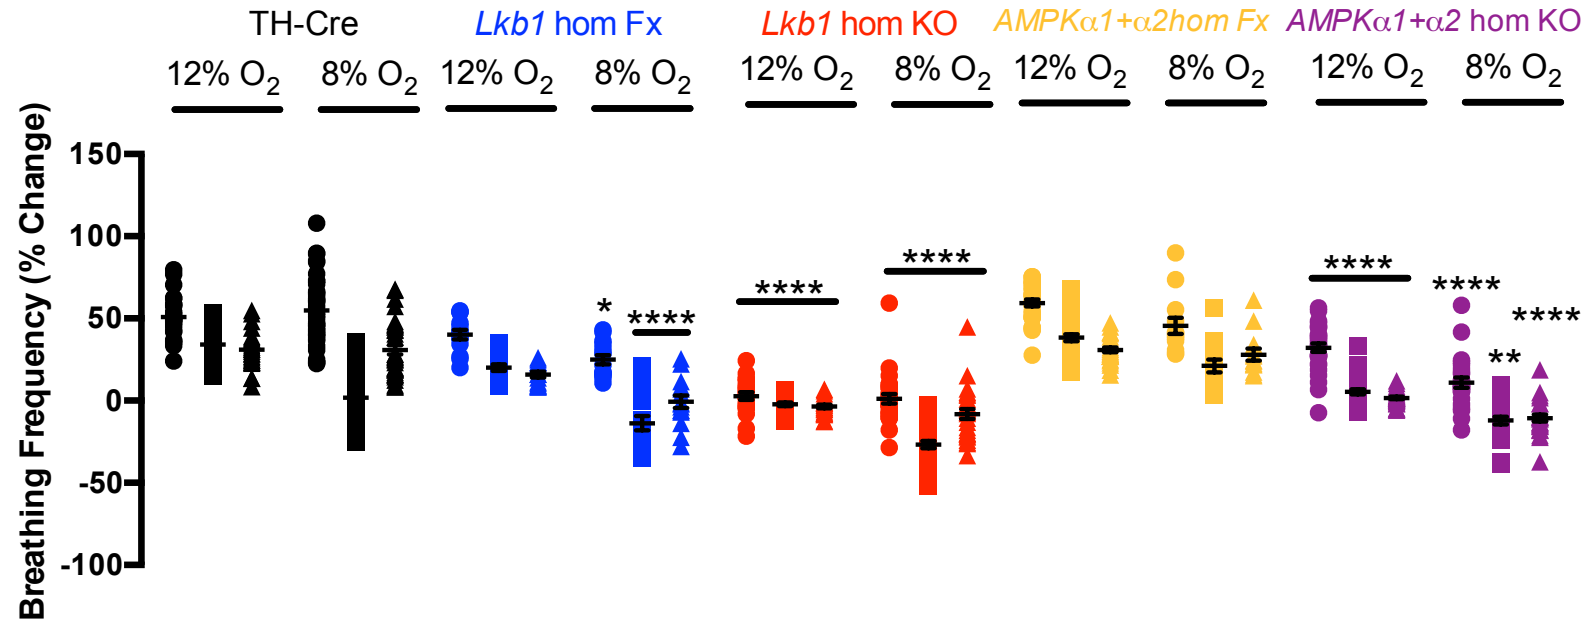

b

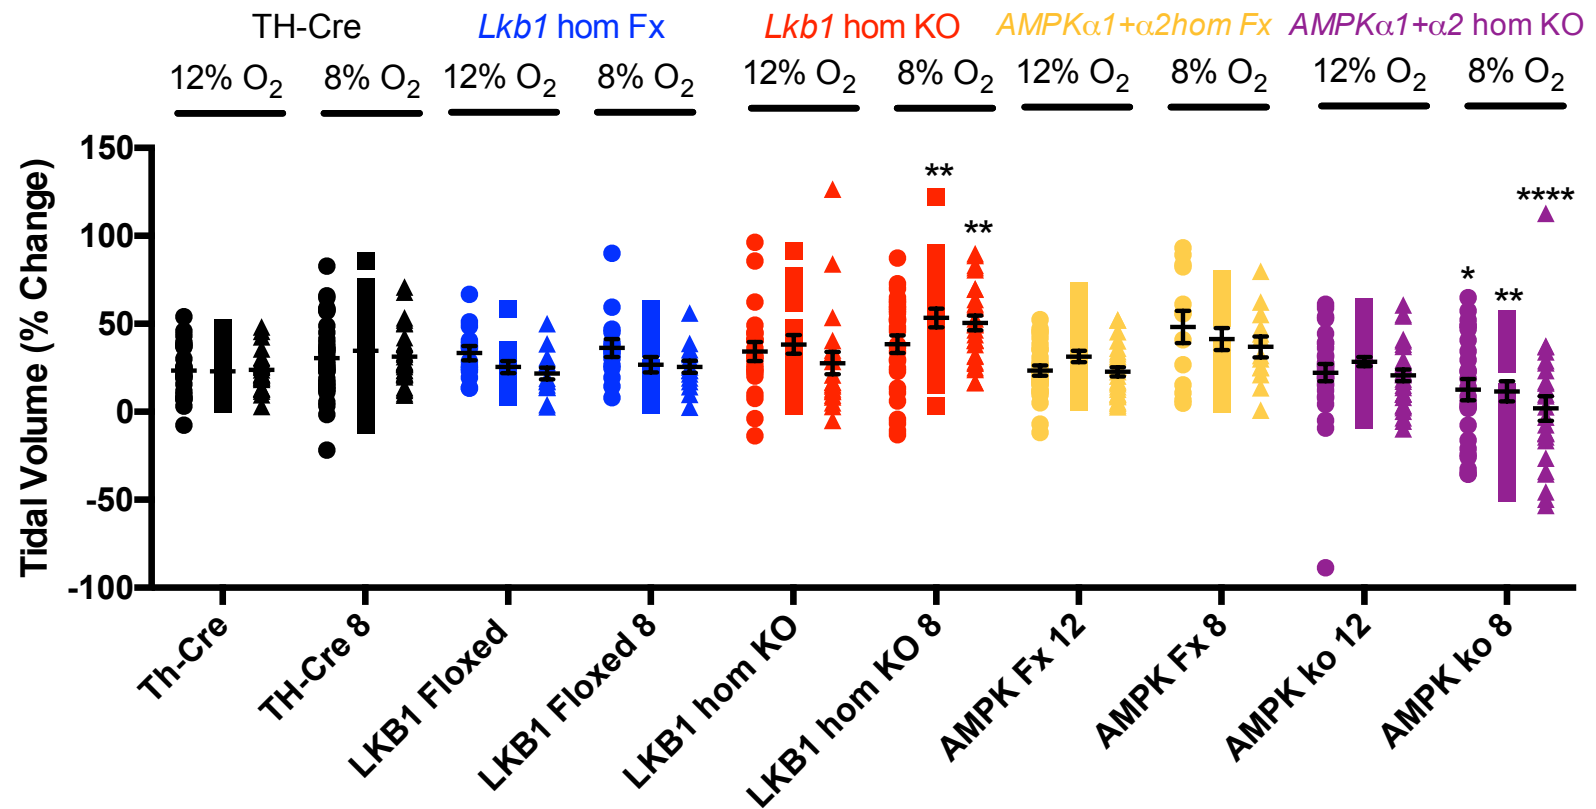

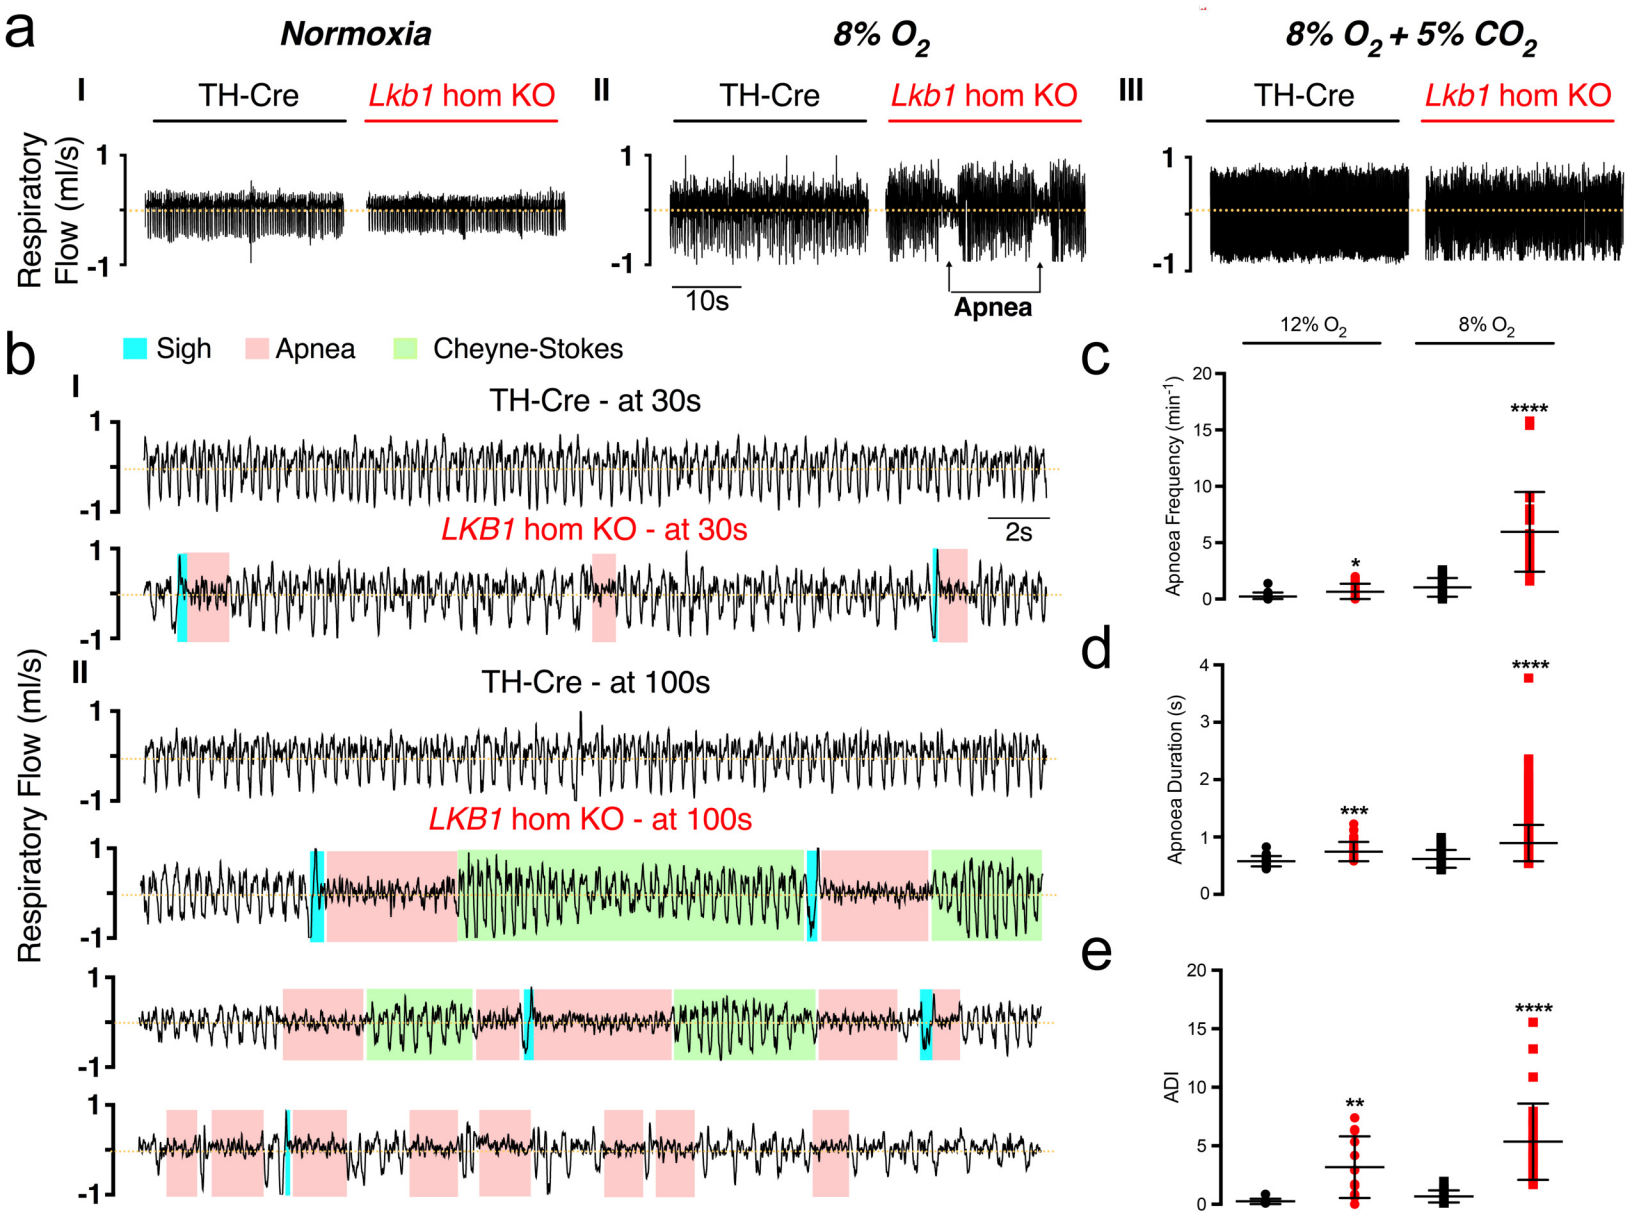

**a**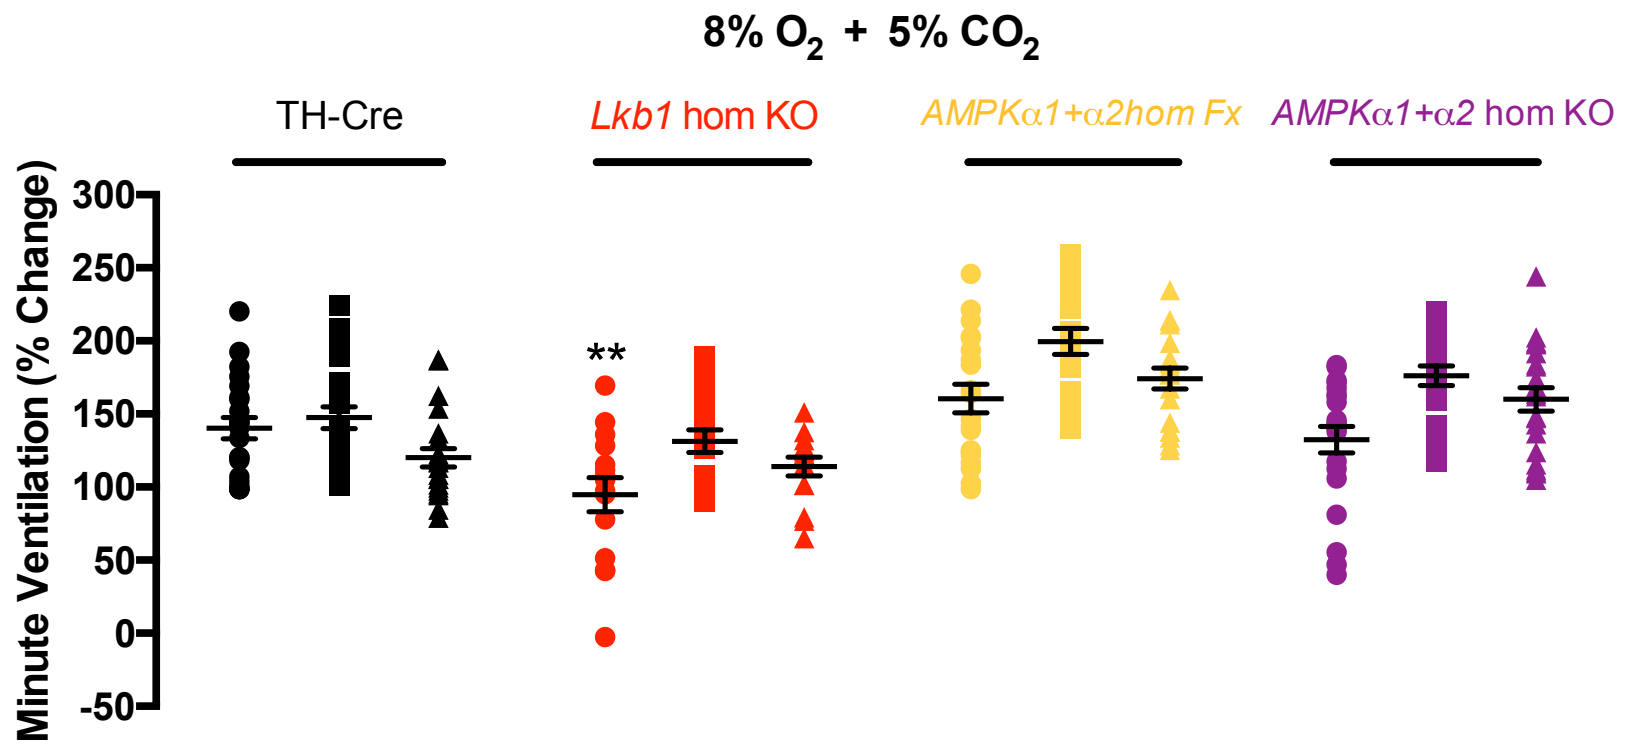**b**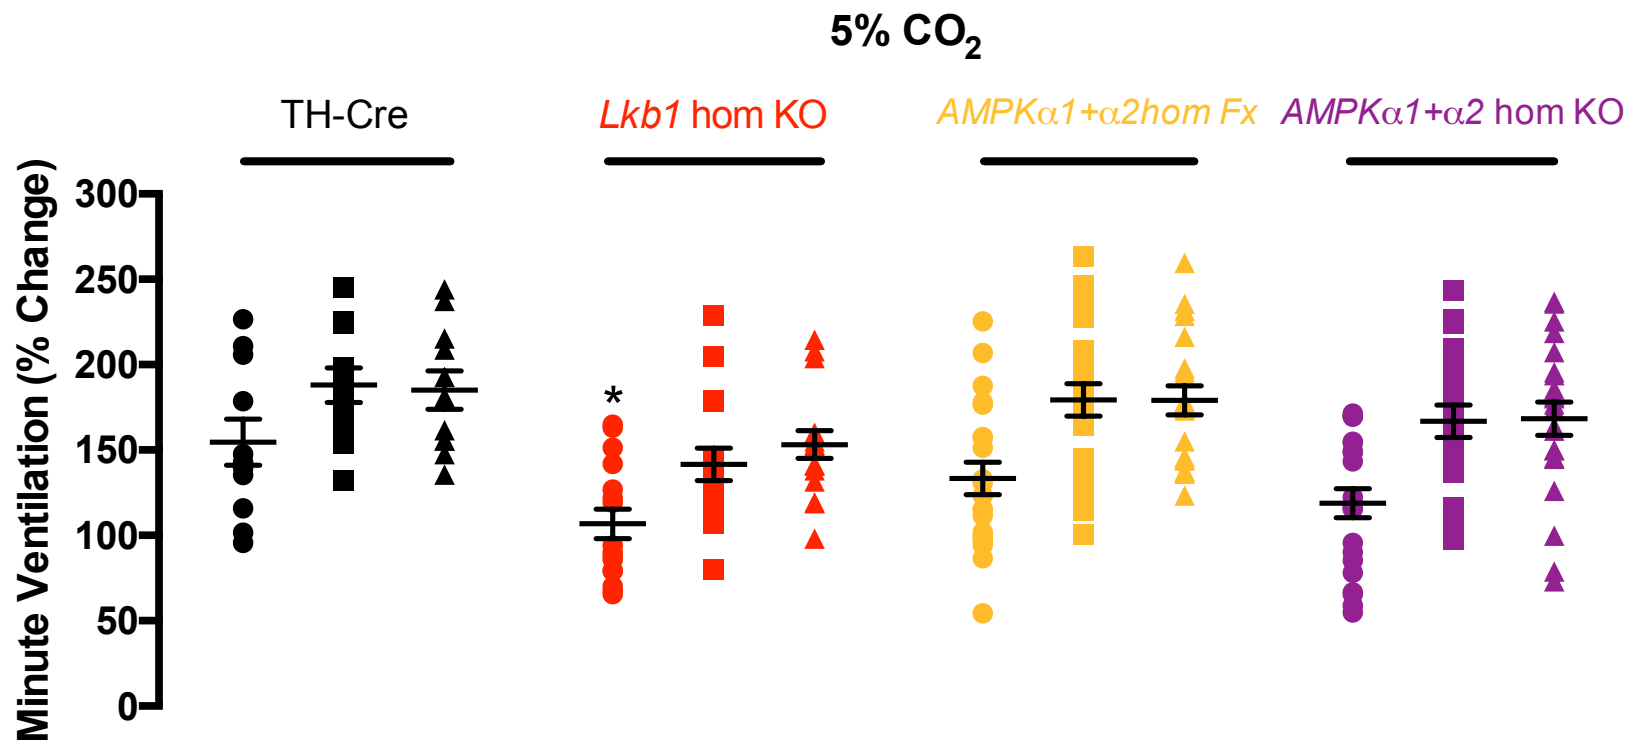

# Carotid Body Type I Cell

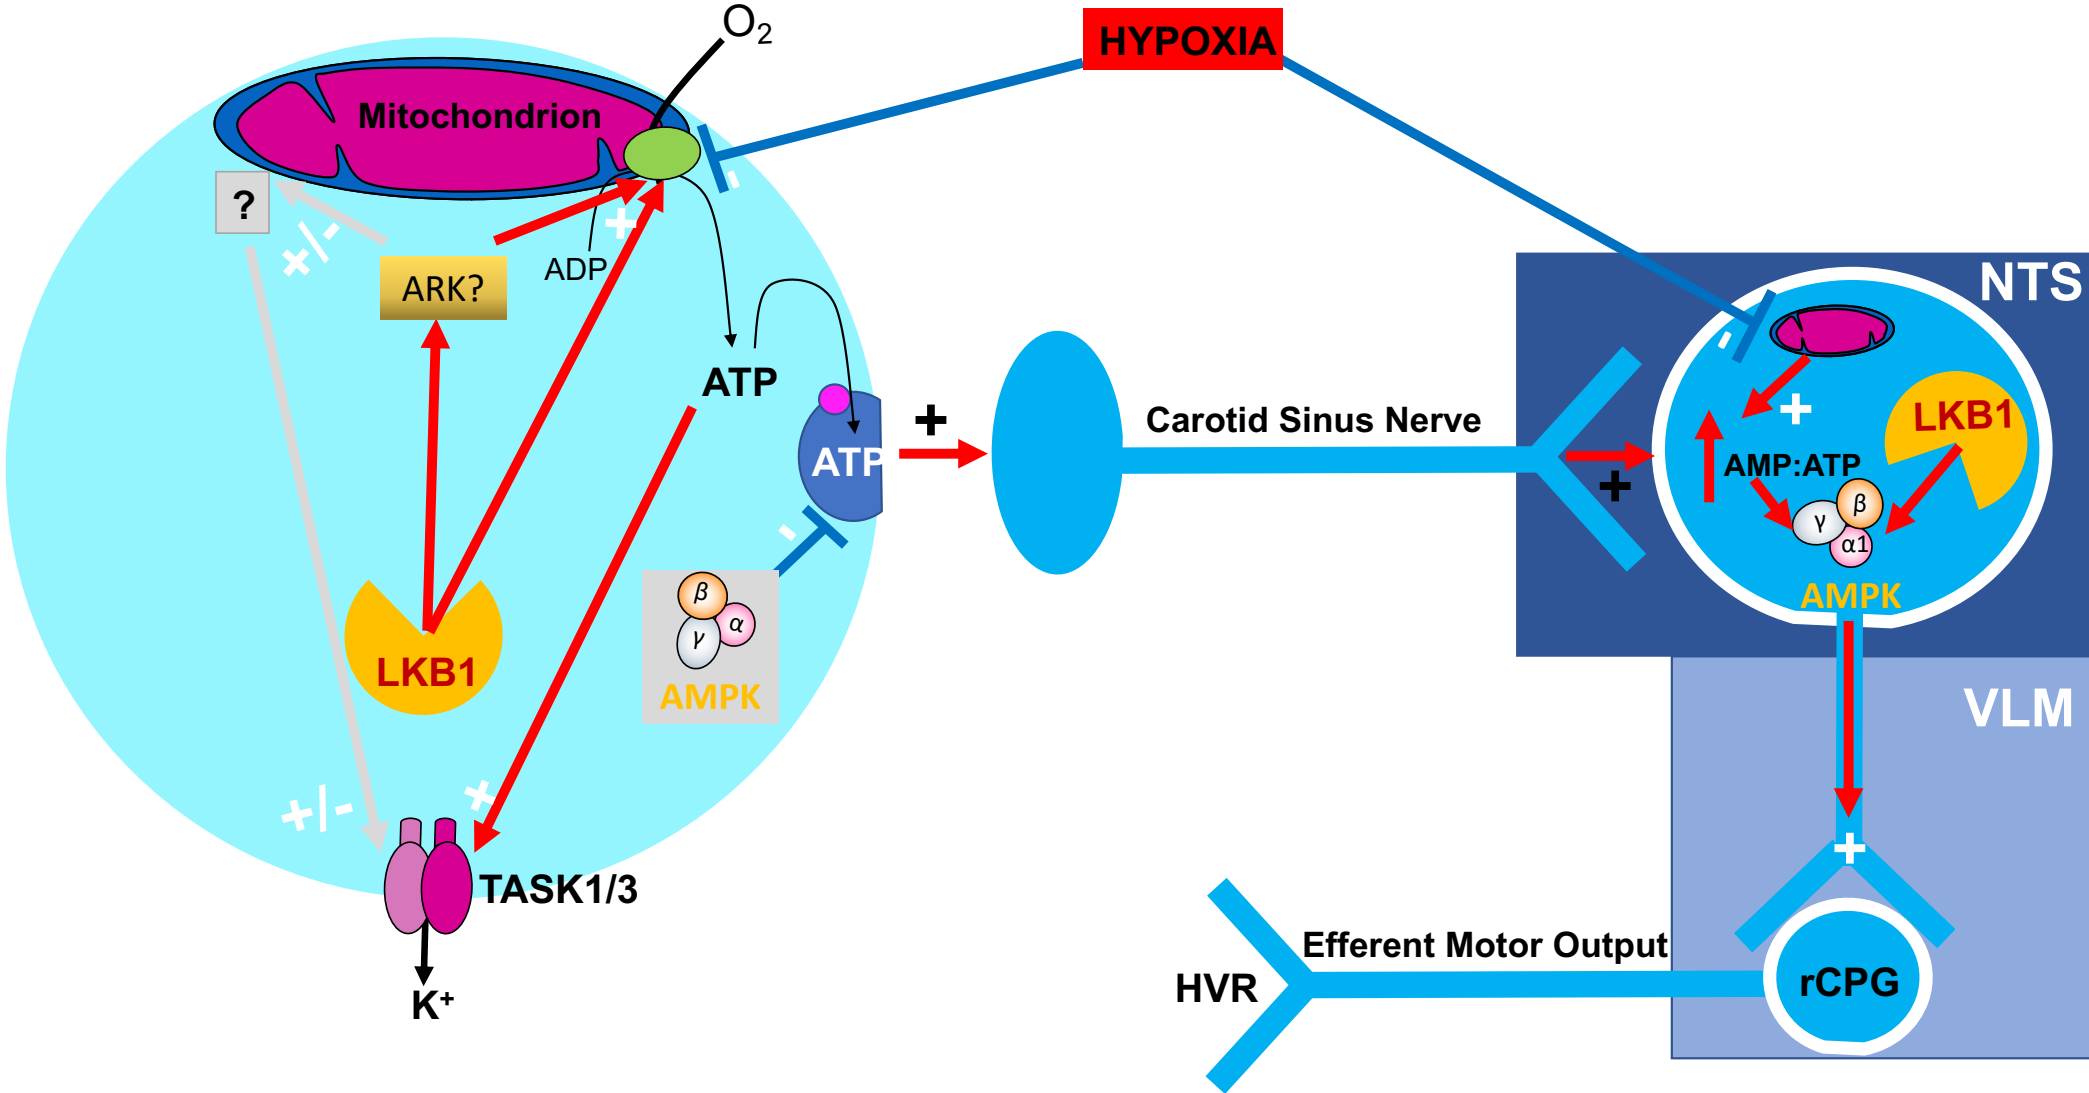

Source: https://www.biorxiv.org/content/10.1101/2022.05.24.493275v1.full.pdf
